# AutonoMouse: High throughput automated operant conditioning shows progressive behavioural impairment with graded olfactory bulb lesions.

Andrew Erskine<sup>1,2</sup>, Thorsten Bus<sup>3</sup>, Jan T. Herb<sup>1,3,4</sup>, and Andreas T. Schaefer<sup>1-4</sup>

<sup>1</sup>The Francis Crick Institute, Neurophysiology of Behaviour Laboratory, London, UK

<sup>2</sup>Department of Neuroscience, Physiology & Pharmacology, University College London, UK

<sup>3</sup>Behavioural Neurophysiology, Max Planck Institute for Medical Research, Heidelberg, Germany

<sup>4</sup>Department of Anatomy and Cell Biology, Faculty of Medicine, University of Heidelberg, Germany

Correspondence should be addressed to [andreas.schaefer@crick.ac.uk](mailto:andreas.schaefer@crick.ac.uk)

## Abstract

Operant conditioning is a crucial tool in neuroscience research for probing brain function. While molecular, anatomical and even physiological techniques have seen radical increases in throughput, efficiency, and reproducibility in recent years, behavioural tools have seen much less of an improvement. Here we present a fully automated, high-throughput system for self-initiated conditioning of up to 25 group-housed, radio-frequency identification (RFID) tagged mice over periods of several months and  $>10^6$  trials. We validate this “AutonoMouse” system in a series of olfactory behavioural tasks and show that acquired data is comparable to previous semi-manual approaches. Furthermore, we use AutonoMouse to systematically probe the impact of graded olfactory bulb lesions on olfactory behaviour and resolve the long-standing conundrum about the apparent lack of impact of lesions on olfactory abilities. The modular nature and open-source design of AutonoMouse should allow for similar robust and systematic assessments across neuroscience research areas.

## Introduction

The ultimate function of the brain is to orchestrate an organism’s behaviour appropriately according to its current environment. Behavioural techniques are therefore an important tool in neuroscience research (Tzschentke, 2007; Crawley, 2008; Claridge-Chang *et al.*, 2009; Harvey *et al.*, 2009; Ben Arous *et al.*, 2010; D H O’Connor *et al.*, 2010; Maimon, Straw and Dickinson, 2010; Seelig *et al.*, 2010; Stirman *et al.*, 2011; Vorhees and Williams, 2014; Rokni *et al.*, 2014; Aronov, Nevers and Tank, 2017; Silasi *et al.*, 2017). Over the last decades, a number of technical advances have allowed for revolutionary improvements in efficiency and throughput in molecular biology (Reuter, Spacek and Snyder, 2015), physiology (Harris *et al.*, 2016) anatomy (Helmstaedter, 2013; Begemann and Galic, 2016) and corresponding analysis techniques (Berning, Boergens and Helmstaedter, 2015; Harris *et al.*, 2016; Pachitariu *et al.*, 2016; Pnevmatikakis *et al.*, 2016; Staffler *et al.*, 2017). By contrast, with some notable exceptions (Aoki *et al.*, 2017; Maor, Elyada and Mizrahi, 2018) in particular in the analysis of movement patterns (Gilestro and Cirelli, 2009; Rihel *et al.*, 2010; Schaefer and Claridge-Chang, 2012; Scott, Brody and Tank, 2013; Machado *et al.*, 2015; Wiltschko *et al.*, 2015; Silasi *et al.*, 2017), behavioural techniques have not seen similarly radical advances in levels of standardisation and throughput, despite their importance to the field.

One core technique of behavioural analysis, operant conditioning (Skinner, 1938), has seen advances in automation, but these approaches often still require an experimenter to be present (Bodyak and Slotnick, 1999; Uchida and Mainen, 2003; Abraham *et al.*, 2004; Rinberg, Koulakov and Gelperin, 2006; Scott, Brody and Tank, 2013) and/or have limitations on the number of animals that can be trained

43 simultaneously (Bussey *et al.*, 2008; Vinueza Veloz *et al.*, 2015; Stirman, Townsend and Smith, 2016;  
44 Francis and Kanold, 2017; Silasi *et al.*, 2017). Furthermore, sessions of training often require frequent  
45 animal handling which can increase stress in experimental subjects (Meaney *et al.*, 1996; Nunez *et al.*,  
46 1996; Balcombe, Barnard and Sandusky, 2004; Meijer *et al.*, 2007) and introduce additional sources  
47 of variability. Strikingly it has been shown that the mere presence of an experimenter even without  
48 manual handling of the animals can affect experimental outcomes (Sorge *et al.*, 2014). Animals may  
49 also need to be water restricted to motivate them to perform behavioural tasks which can lead to  
50 significantly altered physiological state in some cases (Cai *et al.*, 2006; Bekkevold *et al.*, 2013) and/or  
51 over-motivation effects leading to skewed behavioural performance results (Berditchevskaia, Cazé  
52 and Schultz, 2016).

53 Taken together these unintended features of behavioural experimentation can create a level of  
54 unreliability in experimental data, and reduce the consistency of results across experiments and labs.  
55 The manual component of behavioural methods also creates a ‘bottleneck’ which limits the volume  
56 of experimental data that can be collected in comparison to other techniques, thereby contributing  
57 to low sampling and statistical power (Button *et al.*, 2013). This bottleneck can impede systematic  
58 analysis of subtle behavioural phenotypes, for example by limiting the extent to which parameter  
59 space can be explored.

60 One case of this kind of limitation is in discussion of the function and mechanism of the early  
61 mammalian olfactory system. Results of lesioning experiments (Lu and Slotnick, 1998; McBride and  
62 Slotnick, 2006; Slotnick, 2007) in the mouse olfactory bulb and from knockout mice with OSN axon  
63 guidance defects (Knott *et al.*, 2012) have been interpreted as evidence that relatively large  
64 disruptions to the olfactory bulb have little effect on olfactory function (Laurent, 1999; Wilson and  
65 Mainen, 2006). By contrast, other studies report conflicting results (Johnson and Leon, 2007), for  
66 example that major disruptions cause deficiencies in odour recognition and discrimination, whilst  
67 even minor disruptions can affect recognition (Bracey *et al.*, 2013).

68 One explanation for these apparently divergent lines of evidence is that the parameter space of both  
69 olfactory system disruption and olfactory behaviour are not sufficiently explored. To address this, it is  
70 necessary to employ a systematic approach where graded disruptions to the olfactory system are  
71 performed in conjunction with olfactory tasks of varying complexity.

72 We here describe the development of a fully automated operant conditioning system – AutonoMouse  
73 - for socially housed mice that allows simultaneous training and testing of cohorts of up to 25 mice  
74 continuously over periods of several months without water restriction. We apply AutonoMouse to  
75 systematically analyse performance in a range of olfactory tasks before and after lesions of the  
76 olfactory bulb of varying size. Furthermore, we provide components lists, layouts, construction  
77 drawings, and step-by-step instructions for its construction as well as software and manuals in the  
78 appendix to facilitate setup in other labs.

## 79 Results

### 80 AutonoMouse Design

81 AutonoMouse (fig. 1a, appendix fig. 1-5) houses cohorts of up to 25 mice within a common home cage.  
82 Each mouse is individually tagged with a radio-frequency identification (RFID) chip such that individual  
83 performance can be monitored (Voikar *et al.*, 2010; Winter and Schaefer, 2011; Weissbrod *et al.*,  
84 2013; Bains *et al.*, 2016). The home cage (fig. 1a(i), appendix fig. 1, 2(1.), 6a(i), 7), contains various  
85 forms of environmental enrichment including bedding, chew-blocks, shelters and running wheels. The  
86 home cage also contains *ad libitum* access to solid diet. An upper chamber contains the behavioural

126 staging area where water can be accessed (fig. 1a, appendix fig. 7a(v), 8). On entry to this area, an  
127 infra-red beam detector linked to a door-close mechanism is triggered (appendix fig. 7a(vii), 7a(iv),  
128 7c), isolating the animal within the chamber and preventing other animals from interfering with  
129 ongoing behaviour. In the staging area, the animal can automatically initiate a behavioural trial by  
130 blocking an IR sensor which triggers the control software to decode the animal's RFID tag via the RFID  
131 coil also present in the chamber (appendix fig. 8a(iii)). The software reads out the animal identity and  
132 can deliver appropriate sequences of behavioural trials specific to the behaving animal. Trials can be  
133 initiated at any time on entry to the staging area. These trials are assigned a particular valence  
134 (rewarded / unrewarded; fig 1b, c) where successful completion of rewarded trials will result in the  
135 delivery of a small water reward, such that animals can gain their daily water intake by performing a  
136 set of trials per day. It is important to note, that all aspects of the system were designed with the goal  
137 of operation with minimal oversight for extended periods of time. This meant that, for example, the  
138 water reward delivery system was designed from a micro-pump that allowed precision delivery of  
139 small water doses (minimum 0.25µl) with CV 1% accuracy from an arbitrarily large reservoir with  
140 delivered volumes independent of usage (see methods). The housing chamber was designed to allow  
141 for bedding exchange without having to remove animals, again minimizing human interference (see  
142 appendix fig. 6c, d, 10).

143 In summary, this design means that AutoMouse can socially house a large experimental cohort,  
144 provide daily living requirements, and train them simultaneously in a high-throughput manner (fig 1d).  
145 The approach to house a large group of animals socially with a single conditioning chamber further  
146 allows the conditioning chamber itself including stimulus delivery to be designed without  
147 compromising on quality, yet being cost-effective (as only one system is needed for up to 25 animals).  
148 As a result of the complete automation of the system, minimal experimenter presence or intervention  
149 is required for training. Furthermore, group-housing in a social environment from shortly after  
150 weaning (see methods) allowed us to use all-male cohorts (as well as all-female ones) without any  
151 notable display of aggressive behaviour (Van Loo *et al.*, 2001; Van Loo, Van Zutphen and Baumans,  
152 2003). In general, this design is expected to have a significant effect on the stress levels of animals  
153 housed in the system, and therefore improve the reliability of behavioural results (Gouveia and Hurst,  
154 2017). Water dispense rewards in the conditioning chamber could be made conditional on the  
155 animals' behaviour and task structure, according to the profile of sensors installed in the chamber (e.g.  
156 go/no-go, 2-alternative forced choice, motor pattern (Poddar, Kawai and Ölveczky, 2013)). Here we  
157 focus on olfactory go/no-go tasks with lick rate as the response measure (fig. 1b,c).

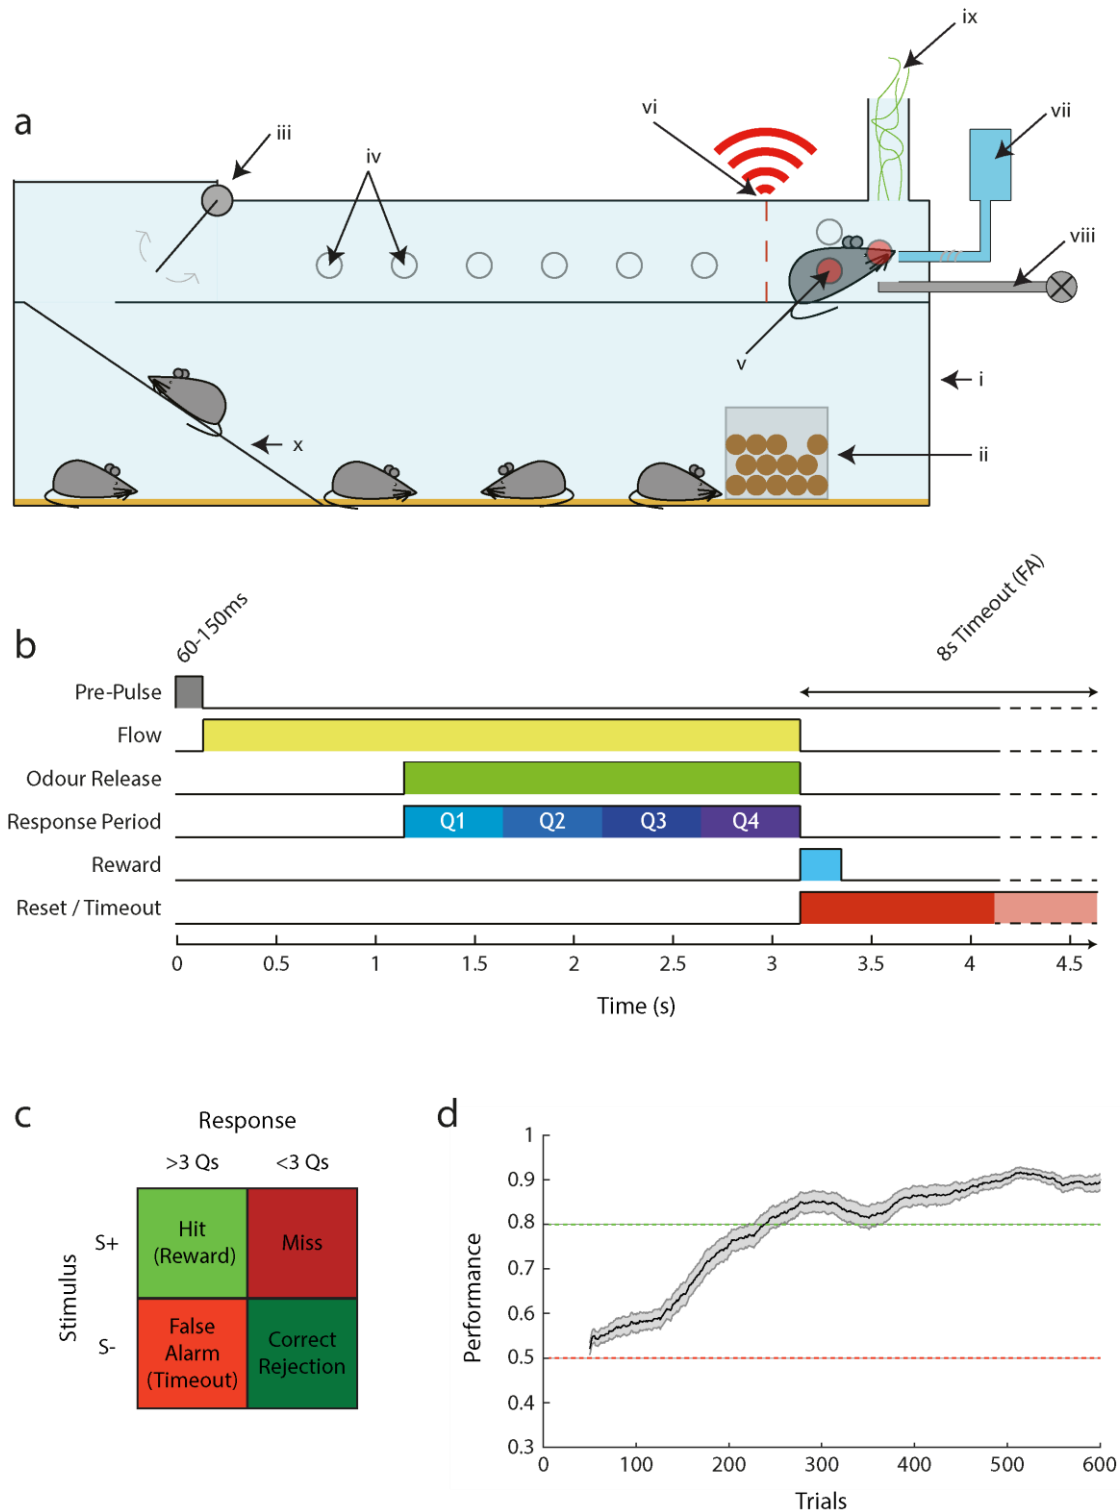

**Figure 1 – AutonoMouse schematic. (a)** Basic design of the AutonoMouse system showing the link between the common home cage and the upper behavioural staging area. **(i)** Main home cage. **(ii)** Food hopper. **(iii)** Access door controlled by IR beam detectors. **(iv)** IR beam detectors, inactive as not blocked by animal. **(v)** Active IR beam detectors blocked by animal. **(vi)** Unique RFID readout. **(vii)** Water reservoir, pump and lickometer. **(viii)** Odour stimulus production. **(ix)** Odour exhaust. **(x)** Access ramp. **(b)** Time course of a typical olfactory go/no-go stimulus in the system. **(c)** Response/reward table showing trial outcomes depending on stimulus type and whether animal licks in  $\geq 3$  (+ve response) response period quarters or  $< 3$  (-ve response) (Q1-Q4 in **(b)**). **(d)** Performance over trials in the first introduced olfactory discrimination task ( $n = 27$ , mean  $\pm$  sem; sliding average with 100 trial window).

197 Consistency and reliability of training in AutonoMouse

198 In olfactory go/no-go discrimination tasks, animals performed between 150 and 560 trials per 24 hours  
199 (mean 333 trials per day +/- 166, n=67 animals, 1,351,320 total trials), with 50% of these trials  
200 performed in continuous stretches of 38-490 trials (fig. 2a, b). The number of trials performed in a  
201 continuous stretch was weakly but significantly correlated to performance accuracy (fig. 2b, inset,  
202 Pearson correlation coefficient  $R = 0.15$ ,  $p = 6.5 \times 10^{-21}$ ). This can be interpreted in a number of ways.  
203 One interpretation is that animals that are generally accurate in the behavioural task tend to perform  
204 more trials than animals that have not sufficiently learned the task. Another interpretation is that  
205 performance tends to increase over continuous stretches of trials, and increases sufficiently that long  
206 stretches of trials will inevitably have higher mean performance scores, regardless of the initial  
207 behavioural ability of the animal.

208 Mice are crepuscular animals and their activity patterns while housed in AutonoMouse closely  
209 followed the internal day-night cycle of the system (fig. 2c, d). Activity reached its minimum during  
210 the 7<sup>th</sup> hour of the light phase and peaked 15 hours later in the 10<sup>th</sup> hour of the dark phase. Total  
211 activity was significantly higher during the dark phase when compared to activity in the light phase  
212 (night: 21:00 – 09:00, day: 09:00 – 21:00. Fraction trials night: 0.61 +/- 0.12, fraction trials day: 0.39  
213 +/- 0.12, t-test  $p = 1.35 \times 10^{-57}$ ). Although activity patterns of AutonoMouse housed animals changed  
214 during the course of the day, accuracy in the performed task did not. Average accuracy within a  
215 particular hour of the day was uncorrelated to the fraction of total trials performed in that hour (fig.  
216 2e, Pearson correlation coefficient  $R = 0.006$ ,  $p = 0.81$ ), and average performance across all mice  
217 binned by hour showed no significant difference between hours (fig. 2f, 1-way ANOVA,  $F = 0.34$ ,  $p >$   
218  $0.99$ ).

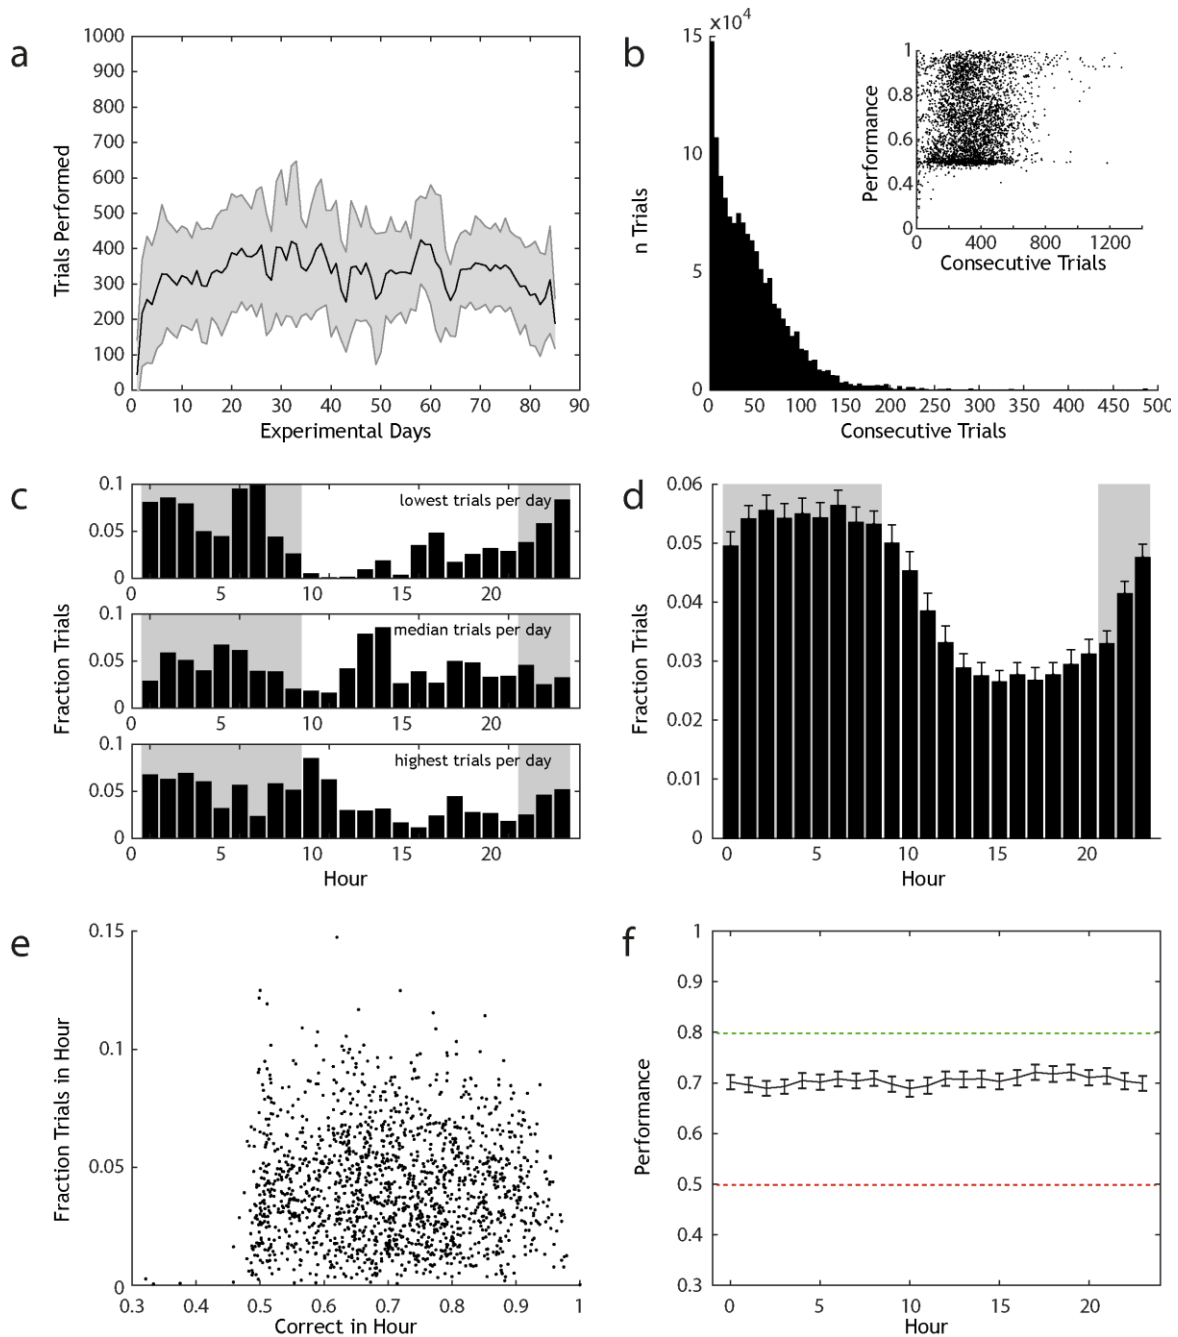

Figure 2 – AutonoMouse gives high volumes of reliable behavioural data. **(a)** Number of trials performed per day by animals housed in AutonoMouse ( $n = 67$ , mean  $\pm$  std, total trials = 1,351,320). **(b)** Number of trials that are performed in sessions of continuous trial sequences ( $<20s$  between trials, mean session length = 38). Inset: performance in each set of consecutive trials plotted against the number of trials within the set. **(c)** Fraction of trials performed in each hour of the day for 3 representative animals that performed the least, median and most trials per day. **(d)** Mean fraction trials performed each hour for all animals (mean  $\pm$  sem). **(e)** For each animal, the overall fraction of trials performed in each hour vs. the average accuracy in that hour. There is no appreciable correlation between these variables ( $R = 0.006$ ,  $p > 0.05$ ). **(f)** Average performance accuracy in each hour of the day, averaged over all animals (mean  $\pm$  sem).

219

220 Odour delivery

221 In order to run AutonoMouse on olfactory conditioning for long-term experiments with minimal

222 human interference, we required a highly stable olfactometer with minimal inter-channel

262 contamination and reliable signal output. The design thus relied on using pure, undiluted chemicals in  
263 individual glass vials with multiple separate odourised channels with consecutive stages of airflow  
264 dilution for concentration control (fig. 3a). Square-pulse stimuli could be reliably generated with rapid  
265 rise time (fig. 3b, rise from baseline to 90% of maximum in 20ms). Contamination between odour  
266 channels was minimal and only release of odourised channels produced any appreciable odour signal  
267 (fig. 3c). Signal amplitude was reliably controlled by the air-dilution method and input flow rate was  
268 linearly related to odour output level (fig. 3d).

269 It is crucial that any stimulus delivery device provides salient behavioural cues for the stimulus of  
270 interest only. Any extraneous variables must not be informative of the reward condition of the  
271 stimulus. To achieve this, in particular during initial training we trained animals on (pure) odours  
272 delivered through combinations of valves (mixing e.g. 20 ml/min odour A from valve 1 with 80 ml  
273 odour A from valve 2 and changing those ratios and valves from trial by trial). This was to assure that  
274 whilst valve clicking, possible flow idiosyncracies and potential contaminations varied from trial to  
275 trial, the intended cue – 100 ml odour A – remained constant. We confirmed that odour was indeed  
276 the only salient cue in our olfactometer by training animals on a subset of available odour channels,  
277 then introducing new odour channels (never used before with this specific odour for the given animal)  
278 after above chance performance was reached (similar as we had done previously in semi-manual  
279 settings Abraham et al. 2004; Shimshek et al. 2005; Abraham et al. 2010). If animals were learning  
280 cues other than odour identity (e.g. valve noise, flow differences, contamination etc.) then  
281 performance accuracy would significantly drop on introduction of new channels. Performance,  
282 however, was indistinguishable before and after introduction of new channels (Figure 3e, f, g; paired  
283 t-test pre vs. post performance, initial: mean  $\pm$  sd =  $0.87 \pm 0.17$  vs.  $0.84 \pm 0.13$ ,  $p = 0.63$ ; novel:  $0.86 \pm$   
284  $0.15$  vs.  $0.88 \pm 0.11$ ,  $p = 0.72$ ; familiar:  $0.96 \pm 0.08$  vs.  $0.94 \pm 0.05$ ,  $p = 0.46$ ), showing that the intended  
285 odour stimulus information was the only cue being learnt. Consequently, completely removing odour  
286 stimulus information by diverting odour release (final valve always diverting odour lines to exhaust  
287 port) reduced GNG performance to chance levels (fig. 3h, t-test final odour diversion performance vs.  
288 chance  $p = 0.38$ ).

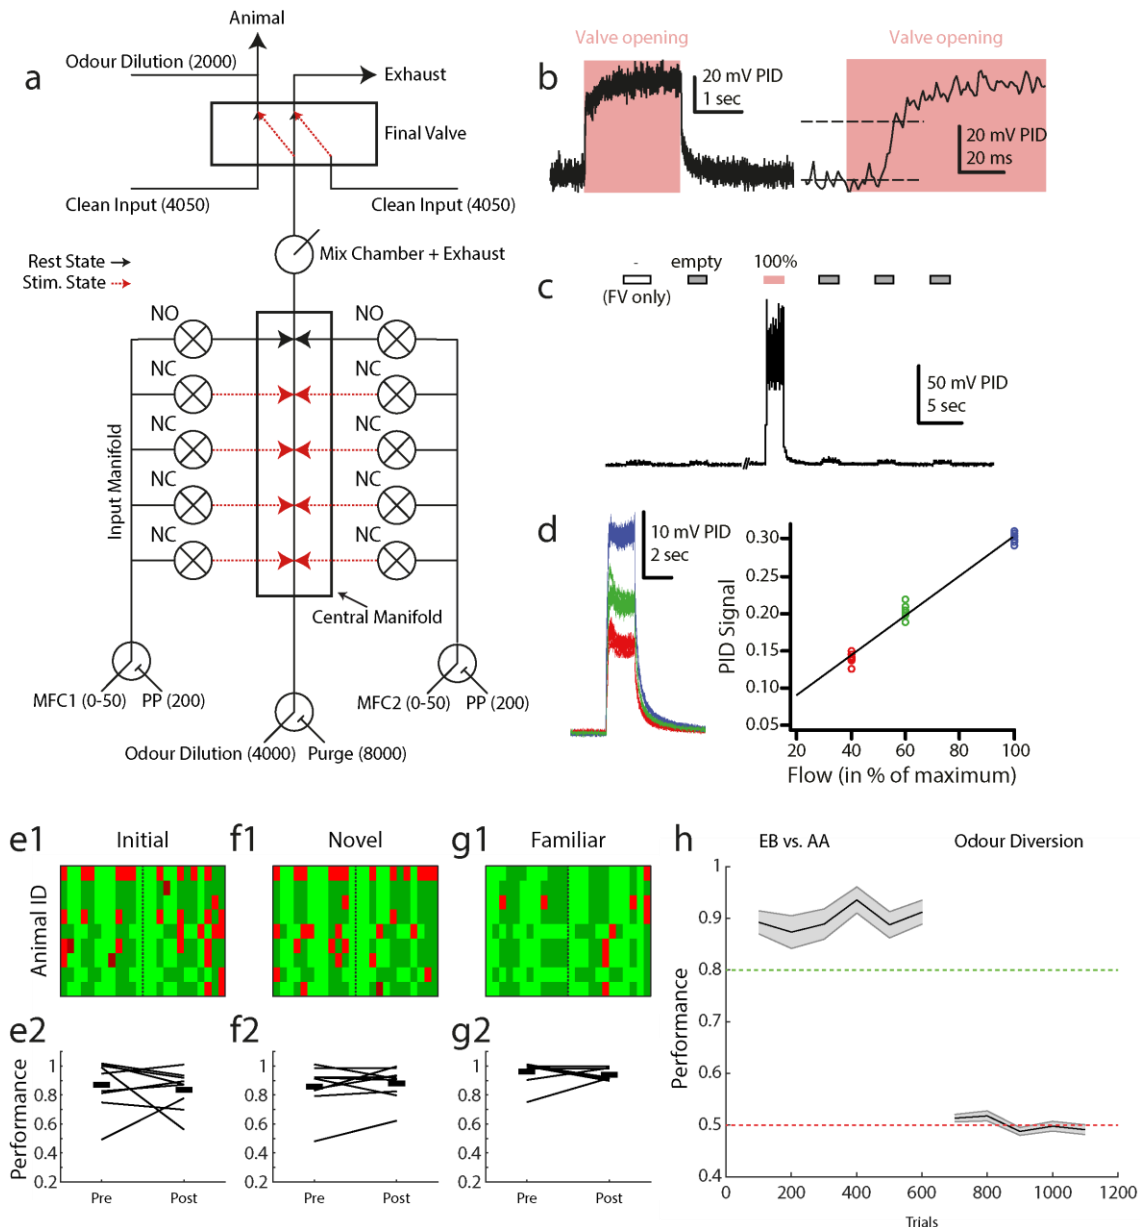

**Figure 3 – Odour delivery.** **(a)** Olfactometer schematic. Numerical values shown indicate supplied air flow in cubic centimeters per minute. Black / red lines indicate resting state (between trials) and odour delivery state air pathways respectively. **(b)** Example PID recorded odour trace. Left: entire recorded pulse, right: at higher temporal resolution. **(c)** Example recording from the olfactometer switching between final valve only (FV only), empty (non-odourised) input and odourised input (100%, red). **(d)** Output odour concentration is reliably controlled by airflow dilution. Left: 10 overlaid odour pulses during maximum MFC input (blue), 60% MFC input (green) and 40% MFC input (red). Right: summary of PID recorded odour signal in the three conditions. **(e1)** Map of trial performance before and after introduction of an extra valve set into the odour stimulus production, during the first odour pair discrimination learnt by this set of animals ( $n = 9$ ). Each row corresponds to an animal, with each column in the row corresponding to a trial (pre-switch  $n = 12$ , post-switch  $n = 12$ ). The vertical dashed line indicates the point at which new valves were introduced. Light green: hit, dark green: correct rejection, light red: false alarm, dark red: miss. **(e2)** Summary of data shown in **(e1)** showing mean performance before and after for each animal in the group (connecting black line, start and end values jittered for ease of visualisation). Thick black lines indicate the mean of the group pre- and post-new valve introduction. **(f1)**, **(f2)**, **(g1)**, **(g2)** Same analysis as in **(e1)**, **(e2)** but for novel and familiar odour pair discrimination respectively. **(h)** Performance in a standard odour pair discrimination (EB vs. AA) followed by diversion of the odour stream in the olfactometer final valve (mean  $\pm$  sem). Performance analyses in 100 trial bins for each animal.



328 Quality of conditioning in AutoMouse

329 Similar to conditioning experiments with a more manual component (Bodyak and Slotnick, 1999;  
330 Abraham *et al.*, 2004; Lepousez and Lledo, 2013), mice rapidly learned to discriminate between two  
331 odours in the AutoMouse system (fig. 4a1, 2, 3). After 7 days of (automated) habituation and pre-  
332 training (see Methods for protocol), the first odour pair was learned in 1-2 days (performance >80%  
333 correct) or 54-398 trials (fig. 4a1, b; performance averaged over 20 trials, trials to criterion indicates  
334 the first trial point at which performance averaged over the preceding 20 trials was equal to or  
335 exceeded 80%). The second, subsequent odour pair was learned in approximately half the time /  
336 number of trials (20-246 trials; “20” implies >80% performance already within the first 20 trials) (fig.  
337 4a2, b). Recognition of the initially learned odour was virtually instantaneous (20-46 trials) (fig. 4a3, b  
338 cf. Bracey *et al.*, 2013).

339 We asked whether there was an appreciable difference in the learning quality of different animals  
340 housed in the system, based on the observation that learning rates in the initial stages of various odour  
341 tasks were variable across animals (see Tables 1-3 for the detailed training schedules). We first  
342 analysed the number of trials needed for animals to reach a criterion level of discrimination  
343 performance to determine whether this was a constant feature for individual animals across different  
344 olfactory tasks. Over three tasks - initial odour pair learning (fig. 4c), novel odour pair learning (fig. 4d)  
345 and a binary mixture discrimination (fig. 4e) – there was no appreciable correlation in trials to criterion  
346 (fig. 4c1, d1, e1), suggesting that although animals varied in their learning rates, they were not  
347 necessarily consistently poor or exemplary in their ability to reach criterion level over all tasks.

348 For each task we defined a group of ‘fast’ and ‘slow’ learners based on their performance within the  
349 first 200 trials of the task (fig. 4c2, d2, e2), where slow animals were those performing at less than the  
350 mean performance in this task period. These groups were defined separately for each task given the  
351 above finding that rate of learning was not consistent across tasks. Although performance in the slow  
352 group was significantly worse than the fast group in the initial stages of each task (by construction; fig.  
353 4c3, d3, e3), final discrimination performance was comparable between the groups; and the maximum  
354 discrimination accuracy was indistinguishable between fast and slow learners (fig. 4c4, d4, e4). Thus,  
355 in the AutoMouse system, virtually all animals can be trained to effectively perform odour  
356 discrimination tasks, even if they are initially poor performers.

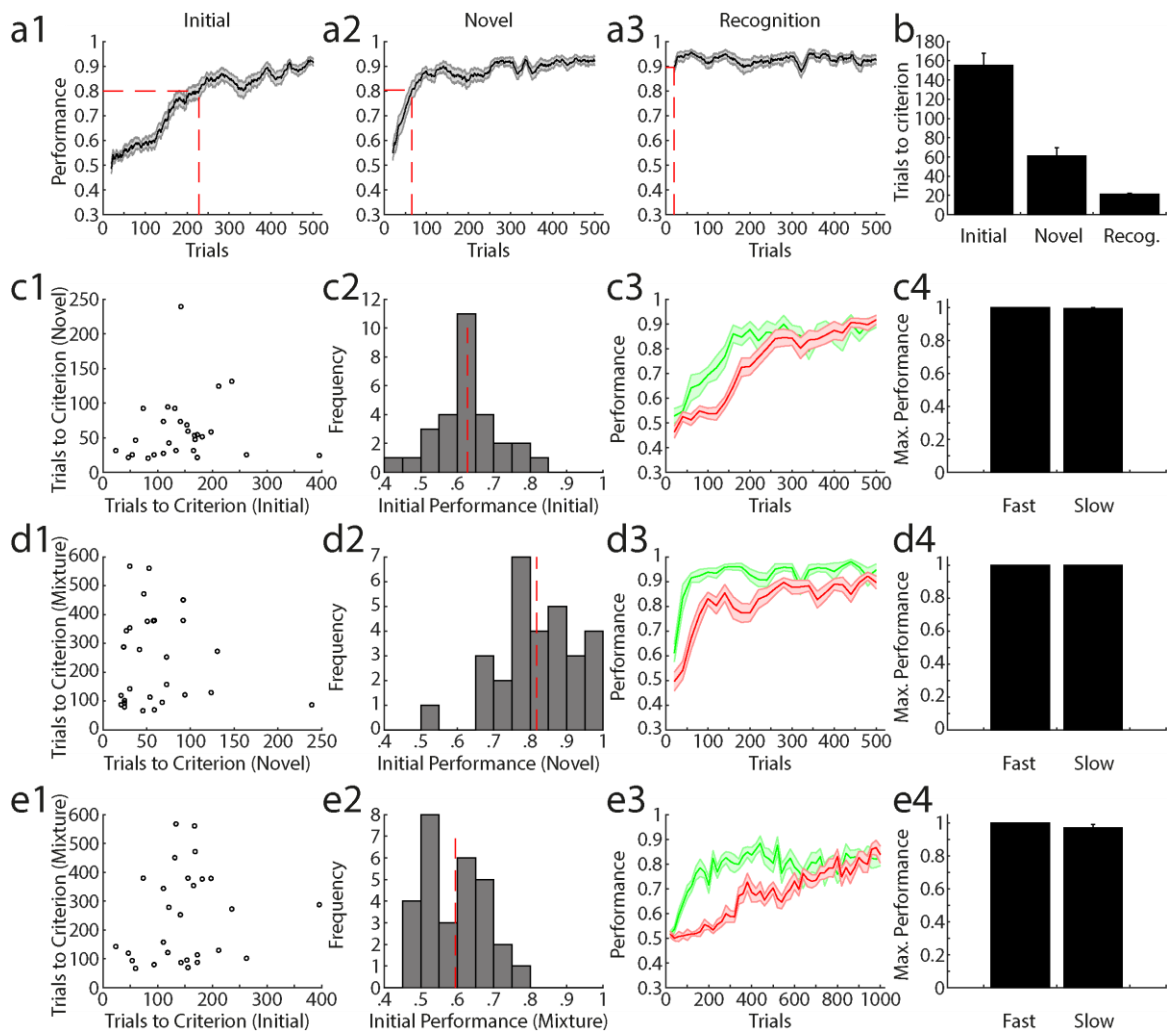

**Figure 4 – Quality of learning during olfactory discrimination in AutonoMouse. (a1)** Average performance in the initial encountered odour pair discrimination ( $n = 29$ , mean  $\pm$  sem) calculated in a 20 trial moving average. **(a2)** Same as in **(a1)** for a novel odour pair discrimination ( $n = 29$ ). **(a3)** Same as in **(a1)** for a previously learned odour pair. **(b)** Number of trials needed to reach criterion (0.8) over animals and tasks shown in **(a1)**, **(a2)**, **(a3)** (mean  $\pm$  sem). **(c1)** Trials needed to reach criterion (TTC) for a novel odour pair vs. TTC on the initial odour pair discrimination for all animals. **(c2)** Histogram of performance in the first 200 trials of the initial odour pair discrimination. Dashed red line indicates mean performance across animals. **(c3)** Average performance separated by whether accuracy level was greater than the mean performance (fast, green) or lower than the mean performance (slow, red) in the first 200 trials of the initial odour pair discrimination (mean  $\pm$  sem). **(c4)** Maximum performance levels reached for animal in the fast and slow groups (mean  $\pm$  sem). **(d1)** as in **(c1)** with trials to criterion in mixture discrimination vs. trials to criterion in novel odour pair discrimination. **(d2)** as in **(c2)** for novel odour pair discrimination. **(d3)** as in **(c3)** for novel odour pair discrimination. **(d4)** as in **(c4)** for novel odour pair discrimination. **(e1)** as in **(c1)** with trials to criterion in mixture discrimination vs. trials to criterion in initial odour pair discrimination. **(e2)** as in **(c2)** for mixture discrimination. **(e3)** as in **(a3)** for mixture discrimination. **(e4)** as in **(c4)** for mixture discrimination.

357

358 Training without water restriction

359 A key feature of AutonoMouse is that stable, reliable training can be achieved without using water  
 360 restriction techniques. We demonstrate this by adjusting the amount of water each animal receives  
 361 per trial. If animals are truly gaining water *ad libitum* in exchange for performing behavioural tasks,  
 362 the number of trials performed should scale proportionally with the amount of water delivered per  
 363 task. Indeed, increasing the water reward proportionally decreased the number of trials performed

403 (fig. 5a). Thus, despite having the option to perform significantly more trials, animals only performed  
404 those trials needed to gain their required daily intake of water (number of trials x reward amount =  
405 constant). It should be noted, however, that decreasing water substantially below 12 $\mu$ l (<100% in fig.  
406 5a) was not compensated sufficiently by additional activity. Furthermore, the average number of trials  
407 per day performed by an animal was related to its weight (fig. 5b). As trials in the system are initiated  
408 by the animals themselves, this suggests that animals were capable of self-regulating their activity  
409 patterns to meet their metabolic demands within AutonoMouse. This in turn allows the experimenter  
410 to adjust the number of trials that animals perform daily (e.g. equalize these numbers across animals)  
411 by adjusting individual water reward levels.

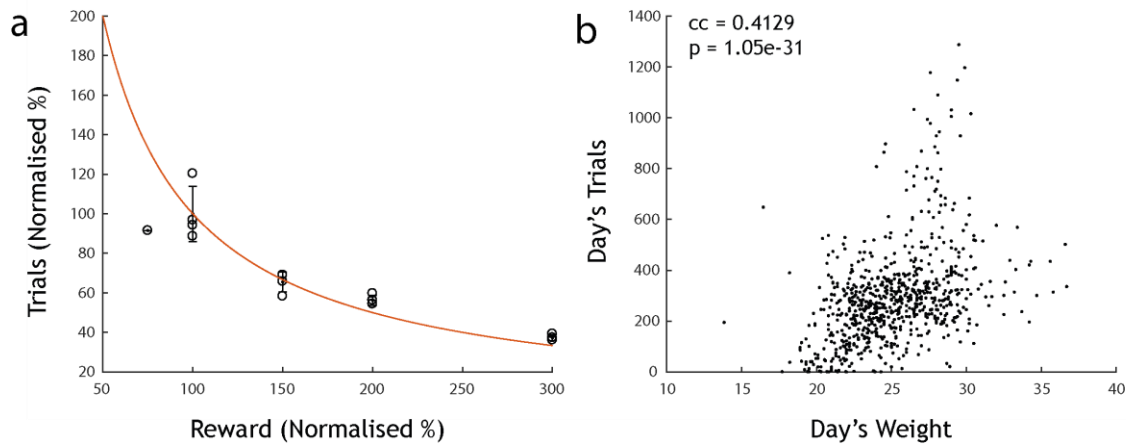

Figure 5 – Mice are motivated but not water restricted. **(a)** Normalised number of trials performed vs. the amount of reward delivered on each correct trial ( $n = 4$  mice, 100% reward = 12 $\mu$ l). Mice perform fewer trials with larger reward volumes (roughly according to the red line of constant daily water intake (red: trials x reward=const line)). **(b)** Number of trials per vs. recorded day's weight in a separate cohort ( $n = 29$ ). There is a strong positive correlation between weight and number of trials performed, suggesting that animals are capable of regulating their own metabolic demands within AutonoMouse.

412

#### 413 Assessment of graded olfactory bulb lesions on olfactory discrimination

414 The large number of trials and tasks that can be acquired with AutonoMouse now allows us to tackle  
415 aforementioned behavioural questions more systematically. We investigated the extent of OB  
416 disruption required to produce complete anosmia, as well as phenotypes observed when OB challenge  
417 was below this threshold. We thus subjected a total of 29 animals in 3 cohorts to stereotaxically  
418 directed OB injections of N-methyl-D-aspartate (NMDA) in varying amounts to produce graded OB  
419 lesions. Volume microCT analysis confirmed that varying NMDA amount between 303 and 2125ng  
420 resulted in lesions of varying size up to an extent that only fragments of OB tissue were visible at the  
421 largest amount (supp. fig. 1).

422 We first investigated lesion-induced anosmia in a cohort by training animals on a battery of odour  
423 discrimination tasks before and after OB excitotoxic (2125ng NMDA,  $n = 8$ ) or sham lesions (1% PBS,  $n = 6$ )  
424 with a range of odour pairs (Cinn. = Cinnamaldehyde, ACP = Acteophenone, EB = Ethyl butyrate,  
425 AA = Amyl acetate, V = Vanillin, P = Phenylethyl alcohol, CN = Cineol, EU = Eugenol, 2H = 2-Heptanone).  
426 Both groups reached high levels of performance accuracy before lesion induction (fig. 6a). Sham  
427 injected mice recognized previously learned odour pair discriminations and quickly learned new odour  
428 pairs and detection tasks (fig. 6a). Mice with full NMDA induced OB lesions showed significantly  
429 reduced performance in all olfactory tasks (fig. 6a), with accuracy levels at no stage distinguishable  
430 from chance levels (t-test final task performance level vs. chance level, CN vs. EU;  $p = 0.26$ , EB vs. AA:

469 p = 0.81). To confirm that lesions did not produce an inability to perform GNG tasks in general we  
470 assessed performance in a series of auditory discrimination tasks. Lesioned animals were able to  
471 perform auditory discrimination tasks as well as sham injected animals (t-test final performance level  
472 sham group vs. lesion group, Audio 1 0.3 vs. 3kHz: p = 0.82, Audio 2 5 vs. 10kHz: 0.22). Performance  
473 deficit was not limited to olfactory discrimination as lesioned animals also failed in odour *detection*  
474 tasks (fig. 6a, S+ detection / S- detection, t-test final performance level vs. chance, S+ detection: p =  
475 0.93, S- detection: p = 0.35). Thus, extensive lesioning of both OB hemispheres resulted in seemingly  
476 complete anosmia.

477 It is presumed that certain tasks in the olfactory discrimination set should be more behaviourally  
478 demanding than others (e.g. learning novel odour pair vs. binary mixture discrimination (Abraham *et*  
479 *al.*, 2004; Rokni *et al.*, 2014)). To quantify this and rank-order different discrimination tasks, pre-lesion  
480 performance data for all animals was pooled according to task identity (fig. 6b-g). Performance for a  
481 familiar odour pair was consistently higher than for other tasks. Novel general odour pair tasks  
482 (“Novel”, “NTS”) were performed with significantly lower accuracy in the first 100 trials (ANOVA with  
483 Tukey-Kramer correction for multiple comparisons,  $F = 65.13$ ,  $p = 1.46 \times 10^{-28}$ ); with binary mixture  
484 discrimination tasks performed at lower accuracy still. Thus, our battery of olfactory discrimination  
485 tasks were variably demanding to complete accurately.

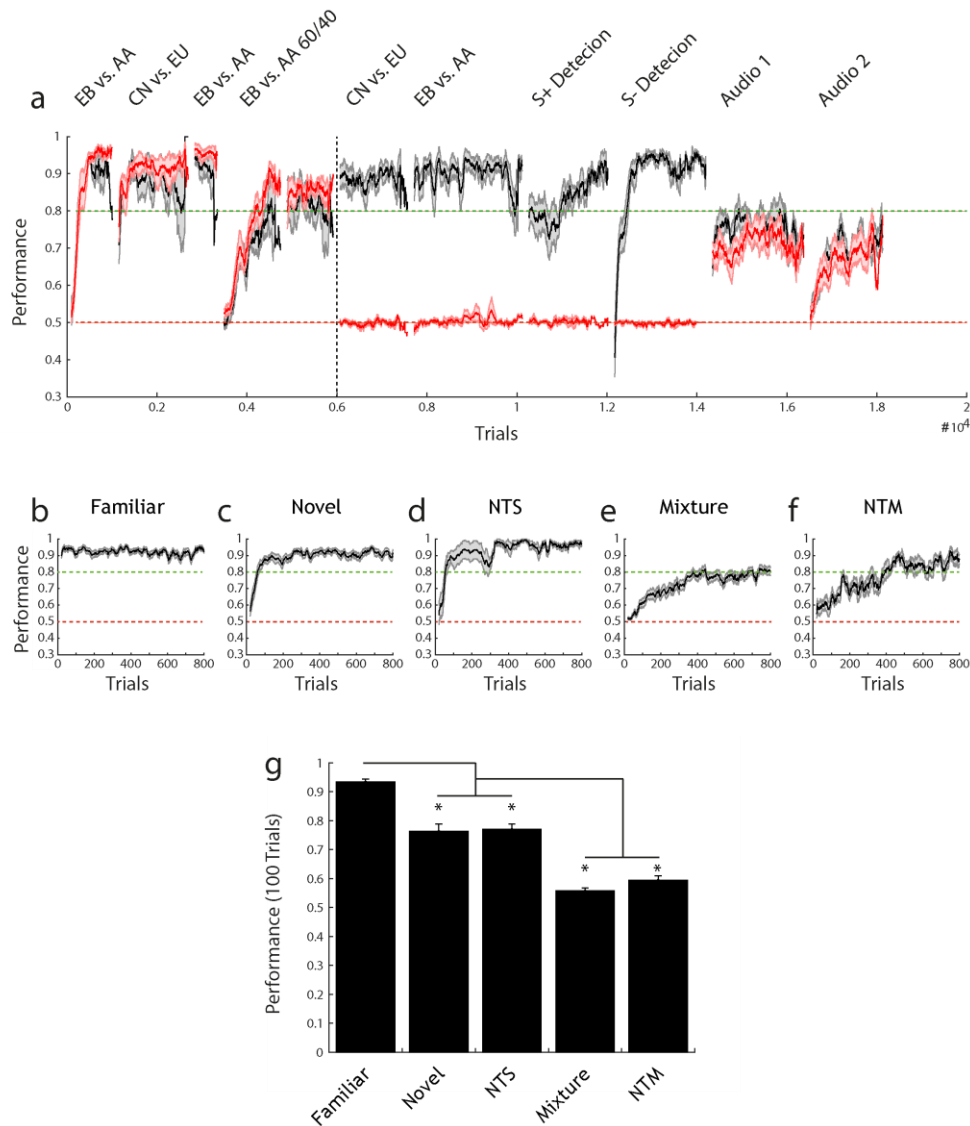

Figure 6 – **(a)** Performance (mean  $\pm$  sem) over several olfactory tasks for sham-injected (black,  $n = 6$ ) and lesion animals (red,  $n = 8$ ). Performance is calculated in a 100 trial moving average. Performance is shown before and after lesion induction (before and after black dotted line respectively). **(b-g)** Pre-lesion/sham performance for each distinct task context. All performance is shown calculated over a 20 trial moving average (mean  $\pm$  sem). **(b)** Familiar task: performing discrimination on a previously learnt odour pair ( $n = 38$ ). **(c)** Novel task: odour pair has not been previously encountered ( $n = 32$ ). **(d)** Non-trigeminal simple task: odour pair has not yet been encountered and both odours are non-trigeminally activating ( $n = 9$ ). **(e)** Mixture task: discrimination between simultaneously presented odours in the ratio 60:40 vs. 40:60 ( $n = 31$ ). **(f)** Non-trigeminal mixture task: same as in **(e)** but both odours are non-trigeminally activating ( $n = 9$ ). **(g)** Performance in the first 100 trials (calculated over 20 trial sliding window) on each task type and statistically compared (1-way ANOVA with Tukey-Kramer correction for multiple comparisons,  $F = 65.13$ ,  $p = 1.46 \times 10^{-28}$ ). Novel and NTS task performance is significantly lower than familiar performance. Mixture and NTM task performance is significantly lower than all other tasks.

486

487 We next asked what odour discrimination capability remained in animals with less extensive lesions  
 488 than those used to produce complete anosmia. Animals administered with smaller NMDA amounts  
 489 (303.6-607.2ng NMDA), and therefore presumptively smaller OB lesions, readily learned to  
 490 discriminate a novel odour pair (Fig. 7a1). Both asymptotic performance as well as learning rate were  
 491 indistinguishable from sham injected animals (Fig. 7a3). Animals with larger lesions (1214-1669.8 ng

527 NMDA) also showed above chance performance (Fig. 7a1) but attained criterion level performance at  
528 a slower rate. Final performance was marginally less than the sham and small lesion groups though  
529 statistically indistinguishable (Fig. 7a3).

530 Although all lesion groups (except “full lesion” animals that were anosmic, Fig 6a) were capable of  
531 performing simple binary discriminations of odours, when groups were presented with an odour pair  
532 learned prior to lesion induction (Fig. 7b), a more subtle phenotype was observed. Performance was  
533 generally similar to the novel odour case with the small lesion group reaching comparable accuracy to  
534 sham animals and the large lesion group reaching consistent above-chance performance. In the early  
535 stages of the task, however, a substantial reduction in performance was already observed for the small  
536 lesion groups (relative to sham) (Fig. 7b3). This difference was significant relative to sham animals in  
537 the first 10 trials of the task where performance of the small lesion group was also not statistically  
538 larger than chance. The small lesion group then quickly regained comparable performance to sham  
539 animals within the first 20-40 trials of the task. This suggests that, for a relatively small OB lesion, the  
540 ability to quickly learn a new odour pair discrimination is largely unaffected but recognition of a  
541 previously learned pair is significantly diminished.

542 Mice were also trained to perform an additional simple binary odour discrimination in which the  
543 odours were non-trigeminal activating in order to determine the extent to which lesion group  
544 discrimination might be based on differential trigeminal activation between odours (Fig. 7c) (Doty *et*  
545 *al.*, 1978; Cometto-Muñiz, Cain and Abraham, 2005; Chen and Halpern, 2008). As with the other simple  
546 discrimination tasks, there was little difference between the lesion groups relative to sham after a  
547 sufficient learning period (Fig. 7c2,3). However, in contrast to the case of a trigeminal-activating odour  
548 discrimination (Fig. 7a) the initial learning rate in the small lesion group was more substantially (and  
549 significantly) impaired compared to sham.

550 The largest difference between groups was observed for non-trigeminal mixture discrimination (NTM)  
551 (Fig. 7d). In this case, both lesion groups performed significantly worse than controls for several  
552 hundreds of trials (Fig. 7d3). In particular, the small lesion group showed a marked reduction in  
553 performance compared to sham. Given that for simple non-trigeminal discrimination (NTS) this group  
554 in many periods exceeded sham performance, this suggests that the additional complexity of mixture  
555 discrimination poses a significant challenge for even a mildly impaired olfactory bulb.

556 These results indicate that a damaged OB can cope relatively easily with simple odour discrimination  
557 tasks and that tasks of this nature are not sufficient to reveal the phenotype change associated with  
558 this damage. By looking in more detail at odour pair recognition, and ability in the case of increasing  
559 task demands such as mixture discrimination, significant impairments can be observed with even  
560 relatively mild OB damage.

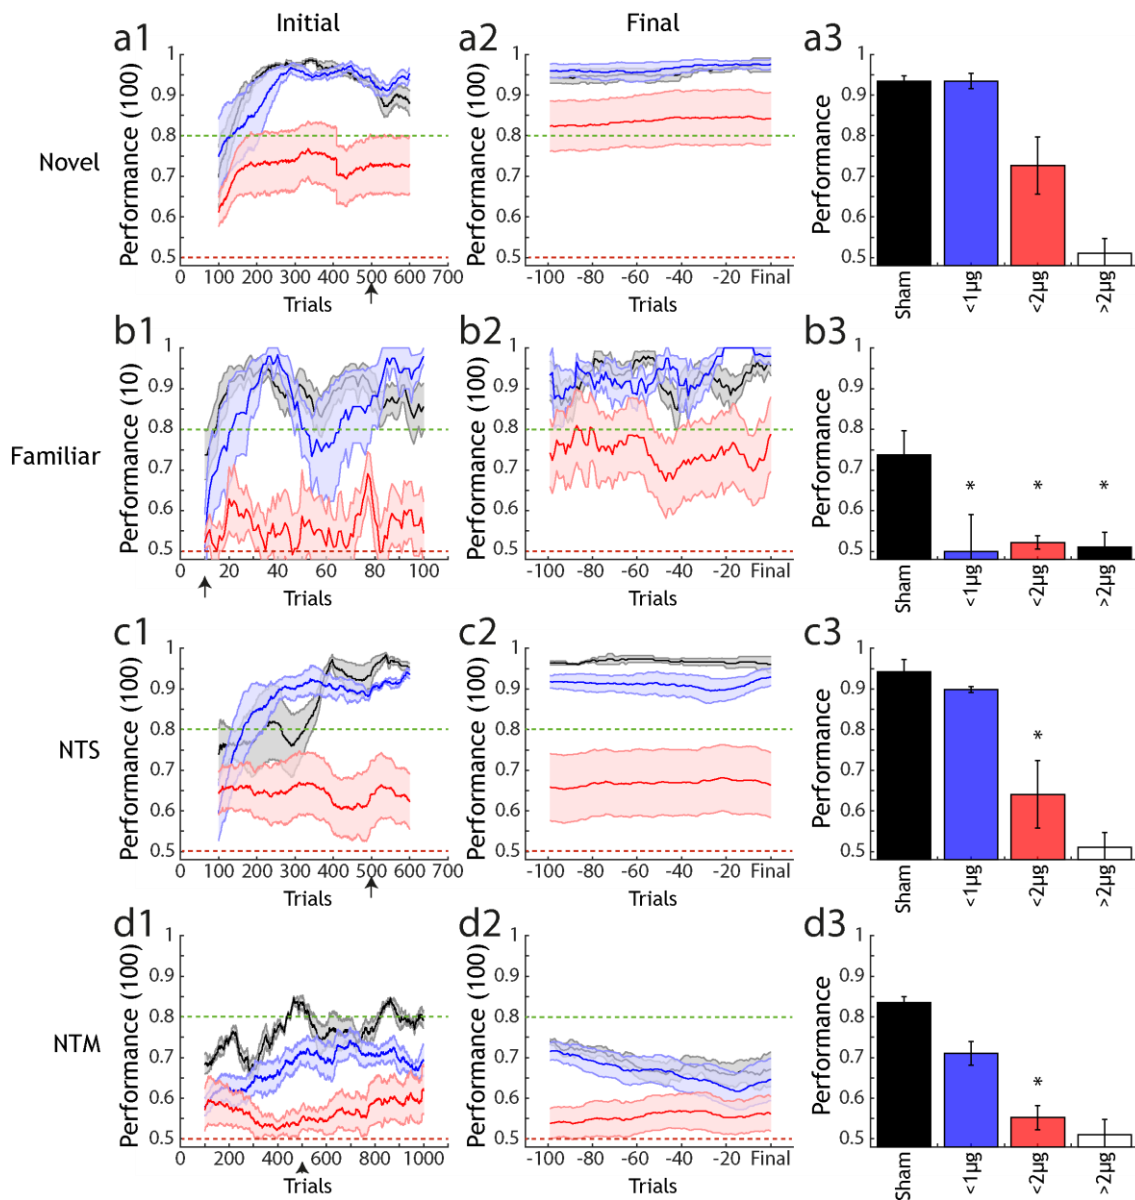

**Figure 7 – Analysis of performance across lesion groups and types of olfactory task. (a1)** Performance of 3 lesion size groups (sham: black, <1000ng NMDA: blue, <2000ng NMDA: red) in a novel odour discrimination task (mean +/- sem). Performance is calculated over a 100 trial moving average. **(a2)** Final performance in the same groups as **(a1)**, performance is calculated for each animal with a sliding window of 100 trials from 100 trials before- up to the final trial performed. **(a3)** Average performance (mean +/- sem) for each group after the number of trials indicated by the black arrow on the x-axis in **(a1)**. Final unfilled bar indicates estimated performance for the anosmic group, based on data gathered for **(d3)**. \* indicates significantly different performance compared to sham under 1-way ANOVA with Tukey-Kramer correction for multiple comparisons. **(b1)-(b3)**, **(c1)-(c3)** and **(d1)-(d3)** are as in **(a1)-(a3)** but for a familiar odour task, non-trigeminal simple task and non-trigeminal mixture task. In **(d1)-(d3)** performance is calculated in a 10 trial sliding window as the crucial metric for a familiar task is performance in the first few trials, where animals must rely on recognition of the previously learned pair rather than ongoing task learning.

## 562 Discussion

### 563 AutonoMouse

564 The design of AutonoMouse enables large-scale, systematic behavioural experiments through high-  
565 throughput, fully automated training of multiple animals simultaneously. Our results show that the  
566 system can train large cohorts of mice, producing 1000s of trials per day across these animals and  
567 motivating them to perform without resorting to methods such as severe water restriction. Crucially,  
568 the automated nature of the system largely eliminates the need for experimenter presence and  
569 intervention during behavioural trials. For mice housed in the system, external stressors such as  
570 manual handling are therefore kept to a minimum. For experimenters, this means that relatively little  
571 time is needed for monitoring ongoing experiments and it is thus completely feasible to run  
572 experiments on several systems in parallel. Animals in the system quickly and reliably acquired the  
573 ability to perform olfactory discrimination tasks with accuracy levels generally comparable or well  
574 above criterion levels commonly used in neuroscience research with similar behavioural tasks (Bodyak  
575 and Slotnick, 1999; Uchida and Mainen, 2007; Bracey *et al.*, 2013; Resulaj and Rinberg, 2015). Overall,  
576 experimenter-animal interactions are minimal and could be eliminated completely if e.g. automatic  
577 weighing is integrated (Schaefer and Claridge-Chang, 2012).

578 Beyond direct behavioural analysis, AutonoMouse could also be used to prepare animals for head-  
579 fixed behavioural paradigms. Head-fixed behaviour is an essential technique in systems neuroscience  
580 that permits simultaneous circuit interrogation with quantitative behavioural readouts. A limitation  
581 of this technique as it is commonly implemented is that it can be highly time-consuming to habituate  
582 and train animals in head-fixed apparatuses (~14 days to criterion per mouse in whisker behaviour:  
583 O'Connor *et al.*, 2010); >4 days in olfactory discrimination including habituation: (Abraham *et al.*,  
584 2012)). While voluntary head fixation experiments (Murphy *et al.*, 2016) can partially alleviate these  
585 challenges for imaging experiments, AutonoMouse could increase the efficiency of this process by  
586 training animals in the intended behavioural task, building up a 'stock' of trained animals through  
587 simultaneous training. These animals could then be transferred to a head-fixed setting on achieving a  
588 reliable criterion level, circumventing the laborious task of manual training.

589 The general design principle of AutonoMouse can be applied to a range of experimental requirements,  
590 giving it some advantage over current RFID based mouse behaviour systems generally designed for  
591 specific tasks (e.g. IntelliCage, (Voikar *et al.*, 2010)). The open-source design is compatible with  
592 operant conditioning in any number of sensory modalities. Olfactory stimulus generation could be  
593 replaced with, for example, a screen or speaker for visual or auditory training. Introduction of a second  
594 lick port would allow for implementation of 2-alternative forced choice paradigms. The behavioural  
595 staging area of AutonoMouse could also be modified to allow for different training paradigms. For  
596 example, the access tunnel could open into a wide-field arena or maze for testing navigational ability  
597 (Winter and Schaefer, 2011).

598 The control software for AutonoMouse allows for installation and acquisition from extra sensors with  
599 relative ease. In future experiments, a respiration monitor (such as a pressure sensor or infra-red  
600 camera) could be installed to monitor sniffing during olfactory discrimination. Recent technical  
601 advances have seen the advent of a number of neurophysiological techniques moving to compact  
602 wireless technology platforms, e.g. head-mounted optogenetic stimulation (Wentz *et al.*, 2011; Park  
603 *et al.*, 2015) and neural recording (Szuts *et al.*, 2011; Hasegawa *et al.*, 2015; Lu *et al.*, 2018). Using  
604 these devices in conjunction with the high-throughput nature of AutonoMouse's behavioural data  
605 collection would comprise a powerful technique for general neuroscience research. Moreover, as the  
606 system itself is adaptable to a number of behavioural tasks, and the software generated schedules can



607 easily be shared between groups AutoNoMouse and systems like it also have the potential to increase  
608 standardisation of behavioural experiments across labs. To promote this we have provided a complete  
609 description and construction manual in the appendix.

#### 610 Assessment of graded olfactory bulb lesion effects

611 In this study we use AutoNoMouse to systematically investigate the effect of excitotoxic lesions of the  
612 OB on olfactory discrimination performance. The results of this investigation address a recurring  
613 controversy in the literature regarding redundancy of OB (spatial) odour coding and the general effect  
614 of lesions on olfactory perception. Near-complete bulbar lesions resulted in anosmia, though  
615 performance in simple discrimination tasks remained intact with large but less extensive lesions.  
616 Reductions in performance were observed for the largest non-anosmic group only for non-trigeminal  
617 discrimination tasks. For small lesions, significant deficits in performance were observed only for  
618 familiar odour tasks in which odour recognition was the tested variable.

619 That odour recognition is the only behaviour consistently affected for all lesion extents suggests that  
620 retention of odour identity perception is particularly sensitive to OB disruption. The reduction of  
621 performance in this task was not due to inability to perform general odour discriminations as all groups  
622 with odour recognition deficits were largely still able to learn novel odour pair discriminations. This is  
623 in agreement with previous findings (Bracey *et al.*, 2013) where it was also reported that transient  
624 decreases in performance accuracy occur for odour recognition tasks (after nasal epithelium lesioning)  
625 followed by rapid re-learning. Together with our findings this suggests that odour recognition is based  
626 on stimulus input matching to previously learned perceptual 'templates' which are degraded by  
627 lesioning resulting in perception of a previously learned odour as novel. The ability to re-learn this  
628 apparently novel odour is largely unaffected, thus the rapid increase in performance accuracy within  
629 only a few 10s of trials.

630 Simple odour discrimination was only significantly impaired once non-trigeminal odour pairs were  
631 introduced, suggesting some odour pairs might be discriminable in part due to differential activation  
632 of the trigeminal nerve. This could account for some of the discrepancies in previous studies that  
633 observe no loss of discrimination ability even with extensive lesions. Intact performance in these cases  
634 could be based on trigeminal rather than olfactory processing. It should be noted, however, that the  
635 largest OB lesions did result in complete anosmia suggesting that trigeminal processing is not sufficient  
636 for odour discrimination. We did not image the trigeminal nerve after lesion induction but given that  
637 the spread of tissue damage was relatively local in our lesions (sup. Fig. 1) it is unlikely that our method  
638 induced damage in the trigeminal pathway. Furthermore, this nerve is well separated anatomically  
639 from the OB in rodents (Bechara *et al.*, 2015) although we cannot exclude effects on the trigeminal  
640 nerve through ethmoid collaterals in the olfactory bulb (Schaefer *et al.*, 2002).

641 Our results go some way to reconciling conflicting views on OB redundancy (Lu and Slotnick, 1998;  
642 Laurent, 1999; McBride and Slotnick, 2006; Wilson and Mainen, 2006; Johnson and Leon, 2007;  
643 Slotnick, 2007; Knott *et al.*, 2012; Bracey *et al.*, 2013). It is true that relatively large lesions of the OB  
644 do not impair simple olfactory behaviours, but more complex tasks involving recognition, mixture  
645 discrimination and discrimination of non-trigeminal stimuli are readily affected by even minor  
646 disruption of the OB. This was revealed in this study by a systematic approach to analysing behaviour  
647 over a range of tasks. The results suggest that OB circuitry required to discriminate between pure  
648 odours is relatively redundant, but the failure of animals with small lesions to instantly recognise  
649 previously learned odours suggests that retention of odour identity is non-redundant in the olfactory  
650 system.

## 651 Methods

652 All animal experiments were performed according to the guidelines of the German animal welfare  
653 law, approved by the local ethics panel and UK Home Office under the Animals (Scientific Procedures)  
654 Act 1986. All mice were C57BL/6 and obtained from Charles River (Basel, Switzerland) or by in house  
655 breeding. Both male and female mice were used (see below), starting transfer into AutoNoMouse from  
656 4-6 weeks of age. All reagents were obtained from Sigma-Aldrich unless noted otherwise.

### 657 AutoNoMouse structure

658 A detailed manual for the construction and operation of the AutoNoMouse system can be found in the  
659 appendix. A repository containing design files for the system hardware can be downloaded from  
660 <https://github.com/RoboDoig/autonomouse-design>. The main control software can be found at  
661 <https://github.com/RoboDoig/autonomouse-control>, and the schedule generation program at  
662 <https://github.com/RoboDoig/schedule-generator>

663

664 In brief, the home cage chamber of AutoNoMouse was constructed from aluminium profiles (MayTec  
665 Aluminium Systemtechnik GmbH, Dachau, Germany) and walled with clear acrylic panels. The cage  
666 dimensions were 52x62x17cm. The cage contained floor-bedding (Alpha Dri, LBS Biotechnology, UK),  
667 environmental enrichment (running wheels, tunnels, soft bedding, 'homes', chew blocks) and a metal  
668 cage containing diet. A pre-chamber area constructed from acrylic panels was connected to the home  
669 cage by a wooden ramp. The pre-chamber was connected to the behaviour port via an acrylic tunnel.  
670 Access to the tunnel/behaviour port was controlled by a swing door, actuated by a rotary magnet  
671 (GDRX 050 X20 D02 24V 100%, Magnet-Schultz, Woking, UK) and controlled with custom electronics.  
672 Infra-red (IR) beam sensors lined the walls of the access tunnel to detect animal presence. All  
673 behaviour was monitored in the behaviour port, which consisted of a custom plastic open faced  
674 enclosure housing an IR beam emitter/detector (PIE310/PID310D, Kodenshi, Nagoya, Japan), an RFID  
675 detector coil, a lick port, and some stimulus delivery device installed according to the desired  
676 behavioural task (e.g. odour port, speaker).

### 677 AutoNoMouse control modules

#### 678 Lick module

679 Animal licking and water delivery was via a lick port housed in the behaviour port. The lick port was a  
680 hollow metal tube, open on the side facing the animal and connected to a water reservoir and gear  
681 pump (*MZR-2521, Harton Anlagentechnik GmbH, Alsdorf, Germany*) on the other side. The gear pump  
682 was controlled with a micro-controller (*S-ND, Harton Anlagentechnik GmbH, Alsdorf, Germany*) which  
683 could receive analog input via the AutoNoMouse software to drive speed and duration of water  
684 delivery. Lick contact with the port was detected with custom electronics (see lick-detector.sch in the  
685 ElectronicsModules section of the autonomouse-design repository and appendix fig. 11).

#### 686 IR module

687 Inputs from the IR beams were managed with custom electronics (see ir-logic.sch in the  
688 ElectronicsModules section of the autonomouse-design repository and appendix fig. 12). This module  
689 powered and received input from IR beam detectors and relayed the on-off logic to other modules.

#### 690 Door module

691 Actuation of the door was controlled with custom electronics (see door-close.sch in the  
692 ElectronicsModules section of the autonomouse-design repository and appendix fig. 13). This module  
693 received input from IR sensors and actuated the rotary magnet according to sensor input. When an  
694 animal was present in either the access tunnel or behaviour port, an IR beam was broken and the door  
695 was closed ensuring that only 1 animal had access to the behaviour port at a time.

696 RFID module

697 The identity of the animal in the behaviour port was read out with an RFID detector and decoder  
698 (*Trovan LID-665 OEM Single Coil Compact Decoder, RFID Systems Ltd., Yorkshire, UK*). The decoded  
699 RFID was relayed to the software via a serial port.

700 Flow control

701 Olfactometer flows for input lines were controlled with a mass-flow controller (*MKS 1179C Mass-Flo,*  
702 *MKS, Andover MA, USA*). Purge of the carrier stream was controlled with an air-pressure regulator  
703 (*Air-regulator, Sigmann Elektronik GmbH, Hüffenhardt, Germany*).

704 Digital / analog control and acquisition

705 All sensor data, digital I/O control and analog I/O control was via a peripheral component interconnect  
706 (PCI) data acquisition (DAQ) device (*PCI-6229, National Instruments, Austin TX, USA*) with a Bayonet  
707 Neill-Concelman (BNC) interface (*BNC 2090A, National Instruments, Austin TX, USA*), except for RFID  
708 reading and day-night cycle control which was via direct serial interface between an LED strip and a  
709 PC.

710 Animal preparation

711 All animals taking part in a particular AutoNoMouse cohort were immediately housed together in a  
712 group cage after weaning to avoid disruption of social hierarchy and aggression later in the experiment  
713 (Van Loo *et al.*, 2001; Van Loo *et al.*, 2003). Animals (either male or female cohorts) underwent RFID  
714 implant surgery and were transferred to AutoNoMouse at 4-6 weeks of age.

715 RFID implant

716 Before being housed in AutoNoMouse, all mice underwent an RFID implant surgery such that they  
717 could be individually identified by the system. Mice were anaesthetised under isoflurane (induction:  
718 5% in O<sub>2</sub> 2l/min, maintenance: 2%) and placed on a heat pad for maintenance of body temperature  
719 during the surgery. The fur around the base of the neck and scruff was shaved away and the skin  
720 cleaned with chlorhexidine (1%) and then dried with a sterile swab. A pre-sterilised needle (*IM-200,*  
721 *RFID Systems Ltd., Yorkshire, UK*) containing an RFID chip (*ID-100B, RFID Systems Ltd., Yorkshire, UK*)  
722 was then loaded onto a plunger and inserted into the loose skin at the base of the neck. The plunger  
723 was used to push the chip out of the needle before removing the needle, leaving the RFID chip  
724 implanted under the skin. Forceps were then used to pinch shut the incision made by the needle and  
725 medical superglue (*Vetbond, 3M, Maplewood MN, USA*) was applied to seal the wound. Animals were  
726 returned to an individual cage for 10 minutes following the surgery to recover from anaesthesia and  
727 for the superglue to dry. Once righting reflex was regained and the wound was confirmed as properly  
728 sealed the mouse was returned to the group cage with its cohort. Very rarely (1/67 of mice undergoing  
729 the surgery) an animal might display some skin irritation over the RFID implant wound. In this case  
730 topical ointment (*Dermisol, Zoetis, Surrey, UK*) was applied daily until the irritation receded.

731 Lesion induction

732 Prior to surgery all utilised surfaces and apparatus were sterilised with 1% trigen. Surgical  
733 instruments were sterilised in an autoclave. Surgery was carried out with standard aseptic technique.

734 A glass injection pipette, pulled on a capillary tube puller (*P-1000, Sutter Instrument, CA USA*) and  
735 broken off to approx. 15µm diameter was back-filled with either NMDA (*Sigma-Aldrich, St. Louis MO,*  
736 *USA*) (10mg/ml diluted in 1% PBS) or 1% PBS and inserted into the injector apparatus (*Nanoject II,*  
737 *Drummond Scientific, PA USA*). Mice were anaesthetised with ketamine/xylazine solution via  
738 intraperitoneal injection (*Vetalar/Rompun; 80mg/kg / 10mg/kg*) and placed on a warm heat pad.  
739 Depth of anaesthesia was monitored throughout the procedure by testing toe-pinch reflex. The fur on  
740 the skull extending from the base of the head to the tip of the nose was shaved away and cleaned

780 with 1% clorhexidine scrub. Mice were then placed on a thermoregulator (*DC Temp. Controller, FHC,*  
 781 *ME USA*) heat pad controlled by a temperature probe inserted rectally. While on the heat pad, the  
 782 animals were inserted into a stereotaxic frame (*900LS, Kopf Instruments, CA USA*) and a sterile surgical  
 783 cover (*Buster op cover, Kruuse, Langeskov, Denmark*) was placed over the body of the animal. The  
 784 scalp was incised and held away from the skull with arterial clamps and two craniotomies were made  
 785 with a dental drill (*Success 40, Osada, Tokyo, Japan*) above the 2 olfactory bulb hemispheres. The  
 786 craniotomies were covered with 1% phosphate-buffered saline (PBS) to prevent drying of brain tissue  
 787 during the surgery. Depending on the desired lesion size, injections of either N-Methyl-D-aspartic acid  
 788 (NMDA, *M3262, Sigma-Aldrich, St. Louis MO, USA*) or PBS were made to several injection sites in the  
 789 bulbs (see table 4).

790 After injection completion, the craniotomy was resealed using silicone elastomer (*KwikCast, World*  
 791 *Precision Instruments, FL USA*) and the skin incision was sutured closed (*Silkam 7/0, Braun, Tuttlingen*  
 792 *Germany*) and cleaned with 1% clorhexidine scrub. Animals were given meloxicam (Metacam; 2mg/kg)  
 793 injected sub-cutaneously for post-operative analgesia. Mice were removed from the stereotaxic  
 794 apparatus and placed in a warm recovery chamber (*Thermo Scientific, MA USA*) (36°C) until recovery  
 795 from anaesthesia was observed (righting reflex regained). Following surgery, animals were singly  
 796 housed for 3 days, and then returned to the AutoNMouse home cage.

797

| Coordinate ID           | 1    | 2    | 3    | 4    | 5    | 6    | 7    | 8    | 9    | 10   |
|-------------------------|------|------|------|------|------|------|------|------|------|------|
| X:                      | 0.85 | 0.85 | 0.85 | 0.85 | 0.85 | 0.85 | 0.85 | 0.85 | 0.65 | 0.65 |
| Y:                      | 0.85 | 0.85 | 0.85 | 1.15 | 1.15 | 1.15 | 1.45 | 1.45 | 0.85 | 0.85 |
| Z:                      | 0.7  | 1.1  | 1.4  | 0.7  | 1.1  | 1.4  | 0.7  | 1.1  | 1.1  | 1.4  |
| n Injections<br>(2.3nl) | 66   | 33   | 33   | 66   | 33   | 33   | 66   | 33   | 66   | 33   |
| Solution (sham)         | PBS  | PBS  | PBS  | PBS  | PBS  | PBS  | PBS  | PBS  | PBS  | PBS  |
| Solution (S)            | NMDA | PBS  | PBS  | PBS  | PBS  | PBS  | PBS  | PBS  | PBS  | PBS  |
| Solution (M)            | NMDA | PBS  | PBS  | PBS  | PBS  | PBS  | NMDA | PBS  | PBS  | PBS  |
| Solution (L)            | PBS  | PBS  | NMDA | NMDA | NMDA | NMDA | NMDA | NMDA | PBS  | PBS  |
| Solution (XL)           | NMDA | NMDA | NMDA | NMDA | NMDA | NMDA | NMDA | NMDA | PBS  | PBS  |
| Solution (XXL)          | NMDA | NMDA | NMDA | NMDA | NMDA | NMDA | NMDA | NMDA | NMDA | NMDA |

Table 1 – Injection sites. Table shows injection sites for each lesion group used in the experiment. For each coordinate (1-10) the x/y/z positions of injections are shown. X position refers to mm away from bregma in the rostro-caudal axis. Y position refers to mm away from bregma in the medio-lateral axis. Z position refers to depth from the surface of the brain. For each injection site, a number of 2.3nl injections were made, given by the n injections row. For each injection site, the solution injected is shown depending on the desired lesion extent (sham, S, M, L, XL, XXL). PBS was at 1% dilution. NMDA solution was 10mg/ml dissolved in 1% PBS.

798

## 799 Odour delivery

800 Odour stimuli were delivered with a custom-built 8 channel olfactometer (see fig. 3) with two parallel  
 801 input lines. Parallel lines were controlled separately and one odour input from each line could  
 802 therefore be delivered to the odour carrier air stream simultaneously. Odour concentration delivered  
 803 to the main odour carrier air stream was controlled by varying the flow and pressure levels in the  
 804 parallel input lines. The stimulus given to the behaving animal was controlled by switching between a  
 805 clean air and odourised air flow line via a 5-way solenoid valve (*VK3210, SMC, Tokyo, Japan*).

806 Where pure odours were delivered to the animal (e.g. in a pulse of EB), the final odour stimulus was  
 807 generated by triggering (at random) a set of valves from each parallel input line connected to the  
 808 odour source of choice. Where binary mixtures of odours were delivered (e.g. in an EB/AA 6/4 pulse)  
 809 the valve choice was also randomised but each input line delivered a separate odour. Each input line  
 810 contained two S+ sources and two S- sources. Therefore, the sequence of valves used to deliver either

811 an S+ or S- stimulus had 4 possible combinations for pure odour stimuli, and 8 possible combinations  
812 for binary mixtures. Chosen at random, these combinations ensured that animals were unlikely to  
813 learn to discriminate the noise of valve opening rather than odour stimulation.

814 To ensure that the odour stimuli were the only salient signals that were learned in the discrimination  
815 task, control stimuli were designed in which the number of active valves was gradually increased.  
816 Initially, animals would be trained on only 4 valves (1 odour 1, 1 odour 2, 2 blank), typically for several  
817 hundred trials. At some point during training, 2 new valves were introduced to stimulus production  
818 and training continued. Finally another 2 valves were added and the full set of 8 was used to generate  
819 stimuli. The transition between valve numbers was automated so there was no additional time delay  
820 from one case to the other. By comparing performance before and after introduction of new valves,  
821 we could confirm that mice were truly using only the odour signals to discriminate. If performance  
822 dropped after introduction of the new valves it was an indication that some extraneous cue to do with  
823 e.g. the noise of valve switching was being learned in addition to or instead of the odour signal.

824 Experiment initiation and maintenance

825 After being implanted with an RFID chip, animals were weighed and transferred into the common  
826 home cage of AutoNoMouse. In general, the first behavioural task assigned to all animals was a pre-  
827 training task designed to train animals to reliably gain their water intake from the behavioural port,  
828 and in which reward could be gained on all trials:

- 829 1. Water delivered as soon as animal detected in behaviour port (10 trials)
- 830 2. Animal must lick at least once to gain water reward once detected in behaviour port (50 trials)
- 831 3. The percentage of total trial time (2s) that the animal must lick to gain a water reward is  
832 increased (up to 10% of trial length) (100 trials)

833 Each water reward was initially 15 $\mu$ l. This was adjusted to 10-30 $\mu$ l depending on animal performance  
834 (to ensure all mice performed roughly the same number of trials per day). During performance of  
835 these trials, animal weight was monitored daily, in addition to number of trials performed, to ensure  
836 that animals were indeed gaining their necessary daily water from the water rewards in the behaviour  
837 port. If any animal dropped more than 5% in weight from the previous day, it was removed from the  
838 system and given water *ad libitum* for 10 minutes before being returned to the system. Any animal  
839 that consistently performed <100 trials per day or consistently dropped in weight (more than 2 days  
840 in a row) was isolated in the behaviour port and manually given water rewards from the lick port. Any  
841 animal that still dropped in weight or performed <100 trials per day after this treatment was removed  
842 from the cohort (<10% of all animals were removed due to low performance).

843 For the first two weeks of any AutoNoMouse experiment, animal weights were checked daily to ensure  
844 health status of the. After two weeks, weight was manually checked more infrequently (every 4-5  
845 days) but total trials performed was monitored daily to ensure animals had all performed >100 trials  
846 in the last 24 hours. Any animals not meeting this criterion were given water *ad libitum* for 10 minutes  
847 and then returned to the system.

848 The system was designed for bedding exchange without direct human-animal contact: A panel  
849 beneath the cage was removed to allow loose bedding to fall through a mesh into a removable drawer.  
850 This was routinely performed when bedding was soiled (<1 per week). Meanwhile, bedding in nests  
851 inside mouse houses could be left unperturbed. Afterwards, the panel was replaced and bedding  
852 refilled from the top. During this procedure – typically occurring during the day time – mice would  
853 either sleep in their nests or reside in the upper behavioural area. Thus minimal disturbance and no  
854 direct human-mouse contact were needed. Mice could be confined to the home cage via an access  
855 panel (appendix fig. 7b(ii)) to allow cleaning of all parts of the upper chamber without human-animal  
856 contact.

857 For “deep cleaning” the AutoMouse system animals were transferred to a temporary group cage  
858 along with any loose bedding. Any areas with animal contact were removed and soaked in disinfectant  
859 (*Trigene, Ceva, Glenorie NSW, Australia*), cleaned and dried. The (AutoMouse) cage floor bedding  
860 was removed and replaced using the quick-removable bedding tray (appendix fig. 6c, 10). Animals  
861 were then transferred back into the system along with loose bedding.

## 862 Task structure

863 All tasks following the pre-training phase followed a standard go/no-go training paradigm. Animals  
864 were presented with either S+ rewarded odour or S- unrewarded odour (reward is reversed for  
865 roughly half the experimental group, e.g. in a group of 20 learning an EB (ethyl butyrate) vs. AA  
866 (isopentyl acetate) task, 10 are trained on EB as the S+ stimulus and 10 are trained on AA as the S+  
867 stimulus) triggered by animal presence in the behavioural port. A water reward could be gained by  
868 licking in at least 3 of the response period quarters following S+ odour presentation. Licking in at least  
869 3 of the response period quarters during S- presentation resulted in an increased ‘timeout’ inter-trial  
870 interval (8-12s), in all other response cases the inter-trial interval was 4s and no water reward was  
871 delivered. Various kinds of discrimination tasks were presented to the experimental cohort. The  
872 terminologies, structure and primary purposes of these tasks are listed below:

### 873 Initial

874 The “initial” task was the first olfactory discrimination task presented after pre-training was complete.  
875 The purpose of this task was primarily to determine that all animals were capable of olfactory  
876 discrimination, and served as an initial version of the “novel” task.

### 877 Novel

878 A “novel” task was any olfactory discrimination between two pure odours in which the odours had  
879 never been previously presented to the animal. The purpose of this task was to determine the speed  
880 of task acquisition and confirm ability to perform discrimination for multiple odour pairs.

### 881 Familiar

882 A “familiar” task was any olfactory discrimination between two pure odours in which the animal had  
883 previously performed a discrimination task with the same two odours. The purpose of this task was to  
884 probe recognition and memory of acquired task learning.

### 885 Non-trigeminal simple (NTS)

886 An “NTS” task was any olfactory discrimination between two pure odours in which the two odours  
887 were non-trigeminally activating (vanillin and phenethyl alcohol, (Chen and Halpern, 2008)). The  
888 purpose of this task was to dissect out any contribution to learning and odour detection from  
889 stimulation of the trigeminal nerve.

### 890 Mixture

891 A “mixture” task was an olfactory discrimination in which animals were asked to discriminate between  
892 mixture ratios of two odours. For example, S+ might be odour 1 and odour 2 mixed together in a  
893 60%:40% ratio, and S- might be the same odours in a 40%:60% ratio. The purpose of this task was to  
894 be a more behaviourally demanding version of olfactory discrimination.

### 895 Non-trigeminal mixture (NTM)

896 An “NTM” task was the same as a mixture discrimination task, but both odours were non-trigeminally  
897 activating. The purpose of this task was both to be a more behaviourally demanding version of  
898 olfactory discrimination while dissecting out any contribution to learning and detection from  
899 stimulation of the trigeminal nerve.

924 Auditory

925 In an “auditory” task, animals were asked to discriminate between two pure audio sine waves at  
926 different frequencies. The purpose of this task within this experimental context was to ensure that  
927 any changes in olfactory discrimination performance were due to changes in olfactory ability rather  
928 than changes in general ability to perform go/no-go (GNG) tasks.

929 S+ / S- detection

930 In a “detection” task, animals were asked to discriminate between an odour and clean air. This  
931 discrimination was either performed with the odour as S+ (S+ detection), or with the clean air as S+  
932 (S- detection). The purpose of this task was to determine an animal's ability to simply detect an odour,  
933 rather than discriminate between two odours.

934 Training schedules

935 Over the course of the lesion study, 3 different cohorts (1: n = 6 female; 2: n = 14 male; 3: n = 9 male)  
936 underwent a set of behavioural tasks shown in tables 1, 2 and 3.

937

| Task (Group 1) | Odours / Hz          | Task type |
|----------------|----------------------|-----------|
| 1              | Cinn. vs. ACP        | Initial   |
| 2              | EB vs. AA            | Novel     |
| 3              | EB vs. AA            | Mixture   |
| 4              | Time delay (25 days) | N/A       |
| 5              | EB vs. AA            | Familiar  |
| 6              | V vs. P              | NTS       |
| 7              | V vs. P              | NTM       |
| Lesion         |                      |           |
| 8              | EB vs. AA            | Familiar  |
| 9              | CN vs. EU            | Novel     |
| 10             | V vs. P              | NTS       |
| 11             | V vs. P              | NTM       |
| 12             | CN vs. EU            | Familiar  |
| 13             | CN vs. EU            | Mixture   |
| 14             | EB vs. AA            | Familiar  |

*Table 2 – Training schedules (group 1). The sequence (numbered) of behavioural tasks for cohort 1 in the lesion study is shown (n = 6 female). The task type is shown for each, as well as the odour pair or auditory frequency used. ‘Lesion’ row indicates the point at which lesions were induced. Task 4 is a time delay – intended to investigate performance in a familiar odour task after a period of not performing odour discrimination.*

938

| Task (Group 2) | Odours / Hz   | Task type    |
|----------------|---------------|--------------|
| 1              | EB vs. AA     | Initial      |
| 2              | CN vs. EU     | Novel        |
| 3              | EB vs. AA     | Familiar     |
| 4              | EB vs. AA     | Mixture      |
| Lesion         |               |              |
| 5              | CN vs. EU     | Familiar     |
| 6              | EB vs. AA     | Familiar     |
| 7              | EB            | S+ detection |
| 8              | EB            | S- detection |
| 9              | 0.3 vs. 3 kHz | Auditory     |
| 10             | 5 vs. 10 kHz  | Auditory     |

Table 3 – Training schedules (group 2). As in table 1 for cohort 2 (n = 14)

939

| Task (Group 3) | Odours / Hz | Task type   |
|----------------|-------------|-------------|
| 1              | EB vs. AA   | Initial     |
| 2              | CN vs. EU   | Novel       |
| 3              | EB vs. AA   | Familiar    |
| 4              | N/A         | Odour block |
| 5              | EB vs. AA   | Mixture     |
| Lesion         |             |             |
| 6              | CN vs. EU   | Familiar    |
| 7              | ACP vs. 2H  | Novel       |
| 8              | V vs. P     | NTS         |
| 9              | V vs. P     | NTM         |

Table 4 - Training schedules (group 3). As in table 1 for cohort 3 (n = 9). Task 4 is an odour diversion task (see fig. 3h) intended as a control to ensure animals were truly using odour information to perform discrimination

940

941 MicroCT imaging

942 In some cases, the brains of mice in the experimental cohort were imaged using x-ray CT imaging to  
 943 determine the extent of OB disruption induced by the lesion / sham surgery. The CT imaging method  
 944 was based on a previously described protocol (Saito and Murase, 2012).

945 Mice were deeply anaesthetised with ketamine/xylazine solution via intraperitoneal injection  
 946 (Vetalar/Rompun; 80mg/kg / 10mg/kg) and sacrificed by transcardial perfusion using 1% PBS clearant  
 947 and 7.5% paraformaldehyde (PFA) perfusative (diluted with 1% PBS). The head was separated from  
 948 the body and left to soak in a 40ml container containing 20ml Iodinated PFA solution (150mg/ml iodine  
 949 – (Niopam 340, Bracco, Milan, Italy) diluted in 7.5% PFA).

950 After a minimum of 15 days soaking at 4°C the heads were transferred to custom made holders with  
 951 attachments for placement in a microCT scanner (SkyScan 1172, Bruker, Kontich, Belgium). A scan of  
 952 the olfactory bulb area was made using 70kV x-ray source power with an aluminium and copper filter  
 953 at pixel resolution of 8.6µm. Ring artefacts were reduced by introduction of random movement into  
 954 the head rotation during the scan. Coronal image sections were reconstructed from the scan using the  
 955 SkyScan NRECON software.



956 Software

957 AutoMouse was controlled with custom Python software for building trial schedules, designing  
958 experiments and delivering these experiments to mice housed in the system. The main codebase and  
959 dependencies are available from the following repositories:

- 960 • <https://github.com/RoboDoig/autonomouse-control>
- 961 • <https://github.com/RoboDoig/schedule-generator>
- 962 • <https://github.com/RoboDoig/pypulse>
- 963 • <https://github.com/RoboDoig/daqface>

964 All analyses and figures were produced with MATLAB (*Mathworks, Natick MA, USA*) with custom  
965 written code.

## 966 Acknowledgements

967 We thank M. Kaiser, E. Stier, the animal facilities at MPI Heidelberg, National Institute for Medical  
968 Research and the Francis Crick Institute for animal care and technical assistance. We thank the  
969 mechanical electronic workshops in Heidelberg (K. Schmidt, M. Lukat, R. Roedel, C. Kieser) and London  
970 (A. Ling, A. Hurst) for excellent support during development and construction, T. Arnett and M. Hajjawi  
971 for help with the  $\mu$ CT, T. Kuner and T. Margrie for discussion and T. Ackels, D. Dasgupta, E. Galliano, R.  
972 Jordan, A. MacAskill, C. Marin, and L. Prieto-Godino for comments on earlier versions of the  
973 manuscript.

974 This work was supported by the Francis Crick Institute, which receives its core funding from Cancer  
975 Research UK (FC001153), the UK Medical Research Council (FC001153), and the Wellcome Trust  
976 (FC001153); the Max-Planck-Society, by the UK Medical Research Council (grant references  
977 MC\_UP\_1202/5), and grants from the DFG-SPP1392, the Federal Ministry of Education and Research  
978 (US-German collaboration computational neuroscience), and the Bauer and Gottschalk foundations.  
979 AS is a Wellcome Trust Investigator (110174/Z/15/Z).

## 980 Competing Interests

981 The authors declare no competing interests

## 982 References

- 983 Abraham, N. M. *et al.* (2004) 'Maintaining accuracy at the expense of speed: stimulus similarity defines  
984 odor discrimination time in mice.', *Neuron*. Elsevier, 44(5), pp. 865–876.
- 985 Abraham, N. M. *et al.* (2010) 'Synaptic inhibition in the olfactory bulb accelerates odor discrimination  
986 in mice.', *Neuron*. Elsevier Ltd, 65(3), pp. 399–411.
- 987 Abraham, N. M. *et al.* (2012) 'Similar odor discrimination behavior in head-restrained and freely  
988 moving mice.', *PloS one*. United States, 7(12), p. e51789.
- 989 Aoki, R. *et al.* (2017) 'An automated platform for high-throughput mouse behavior and physiology with  
990 voluntary head-fixation', *Nature Communications*. Springer US, 8(1).
- 991 Aronov, D., Nevers, R. and Tank, D. W. (2017) 'Mapping of a non-spatial dimension by the  
992 hippocampal-entorhinal circuit', *Nature*. Nature Publishing Group, 543(7647), pp. 719–722.
- 993 Ben Arous, J. *et al.* (2010) 'Automated imaging of neuronal activity in freely behaving *Caenorhabditis*  
994 *elegans*', *Journal of Neuroscience Methods*. Elsevier B.V., 187(2), pp. 229–234.

- 995 Bains, R. S. *et al.* (2016) 'Analysis of Individual Mouse Activity in Group Housed Animals of Different  
996 Inbred Strains using a Novel Automated Home Cage Analysis System', *Frontiers in Behavioral*  
997 *Neuroscience*, 10(June), pp. 1–12.
- 998 Balcombe, J. P., Barnard, N. D. and Sandusky, C. (2004) 'Laboratory routines cause animal stress.',  
999 *Contemporary topics in laboratory animal science / American Association for Laboratory Animal*  
1000 *Science*, 43(6), pp. 42–51.
- 1001 Bechara, A. *et al.* (2015) 'Hoxa2 Selects Barrelette Neuron Identity and Connectivity in the Mouse  
1002 Somatosensory Brainstem', *Cell Reports*, 13(4), pp. 783–797.
- 1003 Begemann, I. and Galic, M. (2016) 'Correlative light electron microscopy: Connecting synaptic  
1004 structure and function', *Frontiers in Synaptic Neuroscience*, 8(AUG), pp. 1–12.
- 1005 Bekkevold, C. M. *et al.* (2013) 'Dehydration Parameters and Standards for Laboratory Mice', *Journal*  
1006 *of the American Association for Laboratory Animal Science*, 52(3), pp. 233–239.
- 1007 Berditchevskaia, A., Cazé, R. D. and Schultz, S. R. (2016) 'Performance in a GO/NOGO perceptual task  
1008 reflects a balance between impulsive and instrumental components of behaviour', *Scientific Reports*.  
1009 Nature Publishing Group, 6(May), pp. 1–15.
- 1010 Berning, M., Boergens, K. M. and Helmstaedter, M. (2015) 'SegEM: Efficient Image Analysis for High-  
1011 Resolution Connectomics', *Neuron*. Elsevier Inc., 87(6), pp. 1193–1206.
- 1012 Bodyak, N. and Slotnick, B. (1999) 'Performance of mice in an automated olfactometer: odor  
1013 detection, discrimination and odor memory.', *Chemical senses*, 24(6), pp. 637–45.
- 1014 Bracey, E. F. *et al.* (2013) 'Perceptual judgements and chronic imaging of altered odour maps indicate  
1015 comprehensive stimulus template matching in olfaction', *Nature Communications*. Nature Publishing  
1016 Group, 4(2100), p. 2100.
- 1017 Bussey, T. J. *et al.* (2008) 'The touchscreen cognitive testing method for rodents: How to get the best  
1018 out of your rat', *Learning & Memory*, 15(7), pp. 516–523.
- 1019 Button, K. S. *et al.* (2013) 'Power failure: Why small sample size undermines the reliability of  
1020 neuroscience', *Nature Reviews Neuroscience*. Nature Publishing Group, 14(5), pp. 365–376.
- 1021 Cai, Q. *et al.* (2006) 'Effects of water restriction on gene expression in mouse renal medulla :  
1022 identification of 3 HSD4 as a collecting duct protein', 5051, pp. 218–224.
- 1023 Chen, V. and Halpern, B. P. (2008) 'Retronasal but not oral-cavity-only identification of purely olfactory  
1024 odorants.', *Chemical senses*, 33(2), pp. 107–18.
- 1025 Claridge-Chang, A. *et al.* (2009) 'Writing Memories with Light-Addressable Reinforcement Circuitry',  
1026 *Cell*, 139(2), pp. 405–415.
- 1027 Cometto-Muñiz, J. E., Cain, W. S. and Abraham, M. H. (2005) 'Determinants for nasal trigeminal  
1028 detection of volatile organic compounds', *Chemical Senses*, 30(8), pp. 627–642.
- 1029 Crawley, J. N. (2008) 'Behavioral Phenotyping Strategies for Mutant Mice', *Neuron*, 57(6), pp. 809–  
1030 818.
- 1031 Doty, R. L. *et al.* (1978) 'Intranasal trigeminal stimulation from odorous volatiles: Psychometric  
1032 responses from anosmic and normal humans', *Physiology and Behavior*. United States, 20(2), pp. 175–  
1033 185.
- 1034 Francis, N. A. and Kanold, P. O. (2017) 'Automated Operant Conditioning in the Mouse Home Cage',  
1035 *Frontiers in Neural Circuits*, 11(March), pp. 1–6.

- 1036 Gilestro, G. F. and Cirelli, C. (2009) 'PySolo: A complete suite for sleep analysis in *Drosophila*',  
1037 *Bioinformatics*, 25(11), pp. 1466–1467.
- 1038 Gouveia, K. and Hurst, J. L. (2017) 'Optimising reliability of mouse performance in behavioural testing:  
1039 The major role of non-aversive handling', *Scientific Reports*. Nature Publishing Group, 7(September  
1040 2016), pp. 1–12.
- 1041 Harris, K. D. *et al.* (2016) 'Improving data quality in neuronal population recordings', *Nature*  
1042 *Neuroscience*, 19(9), pp. 1165–1174.
- 1043 Harvey, C. D. *et al.* (2009) 'Intracellular dynamics of hippocampal place cells during virtual navigation',  
1044 *Nature*. Nature Publishing Group, 461(7266), pp. 941–946.
- 1045 Hasegawa, T. *et al.* (2015) 'A wireless neural recording system with a precision motorized microdrive  
1046 for freely behaving animals', *Scientific Reports*, 5(1), p. 7853.
- 1047 Helmstaedter, M. (2013) 'Cellular-resolution connectomics: Challenges of dense neural circuit  
1048 reconstruction', *Nature Methods*, 10(6), pp. 501–507.
- 1049 Johnson, B. A. and Leon, M. (2007) 'Chemotopic odorant coding in a mammalian olfactory system',  
1050 *Journal of Comparative Neurology*, 503(1), pp. 1–34. (Accessed: 14 May 2013).
- 1051 Knott, T. K. *et al.* (2012) 'Olfactory discrimination largely persists in mice with defects in odorant  
1052 receptor expression and axon guidance.', *Neural development*. BioMed Central Ltd, 7(4), p. 17.
- 1053 Laurent, G. (1999) 'A Systems Perspective on Early Olfactory Coding', *Science*, 286(5440), pp. 723–728.
- 1054 Lepousez, G. and Lledo, P.-M. (2013) 'Odor Discrimination Requires Proper Olfactory Fast Oscillations  
1055 in Awake Mice', *Neuron*. Elsevier Inc., pp. 1–15.
- 1056 Van Loo, P. L. P. *et al.* (2001) 'Modulation of aggression in male mice: Influence of group size and cage  
1057 size', *Physiology and Behavior*, 72(5), pp. 675–683.
- 1058 Van Loo, P. L. P., Van Zutphen, L. F. M. and Baumans, V. (2003) 'Male management: Coping with  
1059 aggression problems in male laboratory mice', *Laboratory Animals*, 37(4), pp. 300–313.
- 1060 Lu, L. *et al.* (2018) 'Wireless optoelectronic photometers for monitoring neuronal dynamics in the deep  
1061 brain', *Proceedings of the National Academy of Sciences*, 115(7), pp. E1374–E1383.
- 1062 Lu, X. and Slotnick, B. M. (1998) 'Olfaction in rats with extensive lesions of the olfactory bulbs:  
1063 implications for odor coding', *Neuroscience*, 84(3), pp. 849–66. (Accessed: 4 October 2013).
- 1064 Machado, A. S. *et al.* (2015) 'A quantitative framework for whole-body coordination reveals specific  
1065 deficits in freely walking ataxic mice', *eLife*, 4(OCTOBER2015), pp. 1–22.
- 1066 Maimon, G., Straw, A. D. and Dickinson, M. H. (2010) 'Active flight increases the gain of visual motion  
1067 processing in *Drosophila*', *Nature Neuroscience*. Nature Publishing Group, 13(3), pp. 393–399.
- 1068 Maor, I., Elyada, Y. and Mizrahi, A. (2018) 'The Educage: an automated platform for studying auditory  
1069 perceptual learning in mice', *bioRxiv*.
- 1070 McBride, K. and Slotnick, B. (2006) 'Discrimination between the enantiomers of carvone and of  
1071 terpinen-4-ol odorants in normal rats and those with lesions of the olfactory bulbs.', *The Journal of*  
1072 *neuroscience : the official journal of the Society for Neuroscience*, 26(39), pp. 9892–901.
- 1073 Meaney, M. J. *et al.* (1996) 'Early environmental regulation of forebrain glucocorticoid receptor gene  
1074 expression: Implications for adrenocortical responses to stress.', *Developmental Neuroscience*, 18(1–  
1075 2), pp. 61–72.

- 1076 Meijer, M. K. *et al.* (2007) 'Influence of environmental enrichment and handling on the acute stress  
1077 response in individually housed mice', *Laboratory Animals*, 41(2), pp. 161–173.
- 1078 Murphy, T. H. *et al.* (2016) 'High-throughput automated home-cage mesoscopic functional imaging of  
1079 mouse cortex', *Nature Communications*, 7.
- 1080 Nunez, J. F. *et al.* (1996) 'Effects of postnatal handling of rats on emotional, HPA-Axis, and prolactin  
1081 reactivity to novelty and conflict', *Physiology and Behavior*, 60(5), pp. 1355–1359.
- 1082 O'Connor, D. H. *et al.* (2010) 'Neural activity in barrel cortex underlying vibrissa-based object  
1083 localization in mice.', *Neuron*. Elsevier Inc., 67(6), pp. 1048–61.
- 1084 O'Connor, D. H. *et al.* (2010) 'Vibrissa-based object localization in head-fixed mice.', *The Journal of  
1085 neuroscience : the official journal of the Society for Neuroscience*, 30(5), pp. 1947–67.
- 1086 Pachitariu, M. *et al.* (2016) 'Kilosort: realtime spike-sorting for extracellular electrophysiology with  
1087 hundreds of channels', *bioRxiv*, p. 61481.
- 1088 Park, S. I. *et al.* (2015) 'Soft, stretchable, fully implantable miniaturized optoelectronic systems for  
1089 wireless optogenetics', *Nat Biotech.* Nature Publishing Group, a division of Macmillan Publishers  
1090 Limited. All Rights Reserved., 33(12), pp. 1280–1286.
- 1091 Pnevmatikakis, E. A. *et al.* (2016) 'Simultaneous Denoising, Deconvolution, and Demixing of Calcium  
1092 Imaging Data', *Neuron*, 89(2), p. 299.
- 1093 Poddar, R., Kawai, R. and Ölveczky, B. P. (2013) 'A fully automated high-throughput training system  
1094 for rodents', *PLoS ONE*, 8(12), pp. 1–10.
- 1095 Resulaj, A. and Rinberg, D. (2015) 'Novel Behavioral Paradigm Reveals Lower Temporal Limits on  
1096 Mouse Olfactory Decisions', *Journal of Neuroscience*, 35(33), pp. 11667–11673.
- 1097 Reuter, J. A., Spacek, D. V. and Snyder, M. P. (2015) 'High-Throughput Sequencing Technologies',  
1098 *Molecular Cell*. Elsevier Inc., 58(4), pp. 586–597.
- 1099 Rihel, J. *et al.* (2010) 'Zebrafish Behavioral Profiling Links Drugs to Biological Targets and Rest/Wake  
1100 Regulation', *Science*, 327(5963), pp. 348–351.
- 1101 Rinberg, D., Koulakov, A. and Gelperin, A. (2006) 'Sparse odor coding in awake behaving mice.', *The  
1102 Journal of neuroscience : the official journal of the Society for Neuroscience*, 26(34), pp. 8857–65.
- 1103 Rokni, D. *et al.* (2014) 'An olfactory cocktail party: figure-ground segregation of odorants in rodents',  
1104 *Nat Neurosci.* Nature Publishing Group, a division of Macmillan Publishers Limited. All Rights  
1105 Reserved., 17(9), pp. 1225–1232.
- 1106 Saito, S. and Murase, K. (2012) 'Ex vivo imaging of mouse brain using micro-CT with non-ionic iodinated  
1107 contrast agent: a comparison with myelin staining.', *The British journal of radiology*, 85(1019), pp.  
1108 e973-8.
- 1109 Schaefer, A. T. and Claridge-Chang, A. (2012) 'The surveillance state of behavioral automation.',  
1110 *Current opinion in neurobiology*. Elsevier Ltd, 22(1), pp. 170–6.
- 1111 Schaefer, M. L. *et al.* (2002) 'Trigeminal collaterals in the nasal epithelium and olfactory bulb: a  
1112 potential route for direct modulation of olfactory information by trigeminal stimuli.', *The Journal of  
1113 comparative neurology*, 444(3), pp. 221–6.
- 1114 Scott, B. B., Brody, C. D. and Tank, D. W. (2013) 'Cellular Resolution Functional Imaging in Behaving  
1115 Rats Using Voluntary Head Restraint', *Neuron*. Elsevier Inc., 80(2), pp. 371–384.
- 1116 Seelig, J. D. *et al.* (2010) 'Two-photon calcium imaging from head-fixed *Drosophila* during optomotor

- 1117 walking behavior', *Nature Methods*, 7(7), pp. 535–540.
- 1118 Shimshek, D. R. *et al.* (2005) 'Enhanced odor discrimination and impaired olfactory memory by  
1119 spatially controlled switch of AMPA receptors.', *PLoS biology*, 3(11), p. e354.
- 1120 Silasi, G. *et al.* (2017) 'Individualized tracking of self-directed motor learning in group-housed mice  
1121 performing a skilled lever positioning task in the home cage', *Journal of Neurophysiology*, p.  
1122 jn.00115.2017.
- 1123 Skinner, B. F. (1938) *The behavior of organisms: an experimental analysis.*, *The behavior of organisms:  
1124 an experimental analysis.* Oxford, England: Appleton-Century.
- 1125 Slotnick, B. (2007) 'Olfactory performance of rats after selective deafferentation of the olfactory bulb  
1126 by 3-methyl indole.', *Chemical senses*, 32(2), pp. 173–81.
- 1127 Sorge, R. E. *et al.* (2014) 'Olfactory exposure to males, including men, causes stress and related  
1128 analgesia in rodents', *Nature Methods*, 11(6), pp. 629–632.
- 1129 Staffler, B. *et al.* (2017) 'SynEM, automated synapse detection for connectomics', *eLife*, 6, pp. 1–25.
- 1130 Stirman, J. N. *et al.* (2011) 'NIH Public Access', *October*, 8(2), pp. 153–158.
- 1131 Stirman, J. N., Townsend, L. B. and Smith, S. L. (2016) 'A touchscreen based global motion perception  
1132 task for mice', *Vision Research*. The Authors, 127, pp. 74–83.
- 1133 Szuts, T. A. *et al.* (2011) 'A wireless multi-channel neural amplifier for freely moving animals', *Nat  
1134 Neurosci.* Nature Publishing Group, a division of Macmillan Publishers Limited. All Rights Reserved.,  
1135 14(2), pp. 263–269.
- 1136 Tzschentke, T. M. (2007) 'REVIEW ON CPP: Measuring reward with the conditioned place preference  
1137 (CPP) paradigm: update of the last decade', *Addiction Biology*. Blackwell Publishing Ltd, 12(3–4), pp.  
1138 227–462.
- 1139 Uchida, N. and Mainen, Z. F. (2003) 'Speed and accuracy of olfactory discrimination in the rat.', *Nature  
1140 neuroscience*, 6(11), pp. 1224–9.
- 1141 Uchida, N. and Mainen, Z. F. (2007) 'Odor concentration invariance by chemical ratio coding.',  
1142 *Frontiers in systems neuroscience*, 1(April), p. 3.
- 1143 Vinueza Veloz, M. F. *et al.* (2015) 'Cerebellar control of gait and interlimb coordination', *Brain Structure  
1144 and Function*, 220(6), pp. 3513–3536.
- 1145 Voikar, V. *et al.* (2010) 'Conditioned response suppression in the IntelliCage: assessment of mouse  
1146 strain differences and effects of hippocampal and striatal lesions on acquisition and retention of  
1147 memory', *Behavioural Brain Research*, 213(2), pp. 304–312.
- 1148 Vorhees, C. V. and Williams, M. T. (2014) 'Assessing spatial learning and memory in rodents', *ILAR  
1149 Journal*, 55(2), pp. 310–332.
- 1150 Weissbrod, A. *et al.* (2013) 'Automated long-term tracking and social behavioural phenotyping of  
1151 animal colonies within a semi-natural environment', *Nature Communications*. Nature Publishing  
1152 Group, 4(May), pp. 1–10.
- 1153 Wentz, C. T. *et al.* (2011) 'A wirelessly powered and controlled device for optical neural control of  
1154 freely-behaving animals.', *Journal of neural engineering*. England, 8(4), p. 46021.
- 1155 Wilson, R. I. and Mainen, Z. F. (2006) 'Early events in olfactory processing.', *Annual review of  
1156 neuroscience*, 29, pp. 163–201.

1165 Wiltschko, A. B. *et al.* (2015) 'Mapping Sub-Second Structure in Mouse Behavior', *Neuron*. Elsevier Inc.,  
1166 88(6), pp. 1121–1135.

1167 Winter, Y. and Schaefer, A. T. U. (2011) 'A sorting system with automated gates permits individual  
1168 operant experiments with mice from a social home cage.', *Journal of neuroscience methods*. Elsevier  
1169 B.V., 196(2), pp. 276–80.

1170

1171 Supplementary Figures

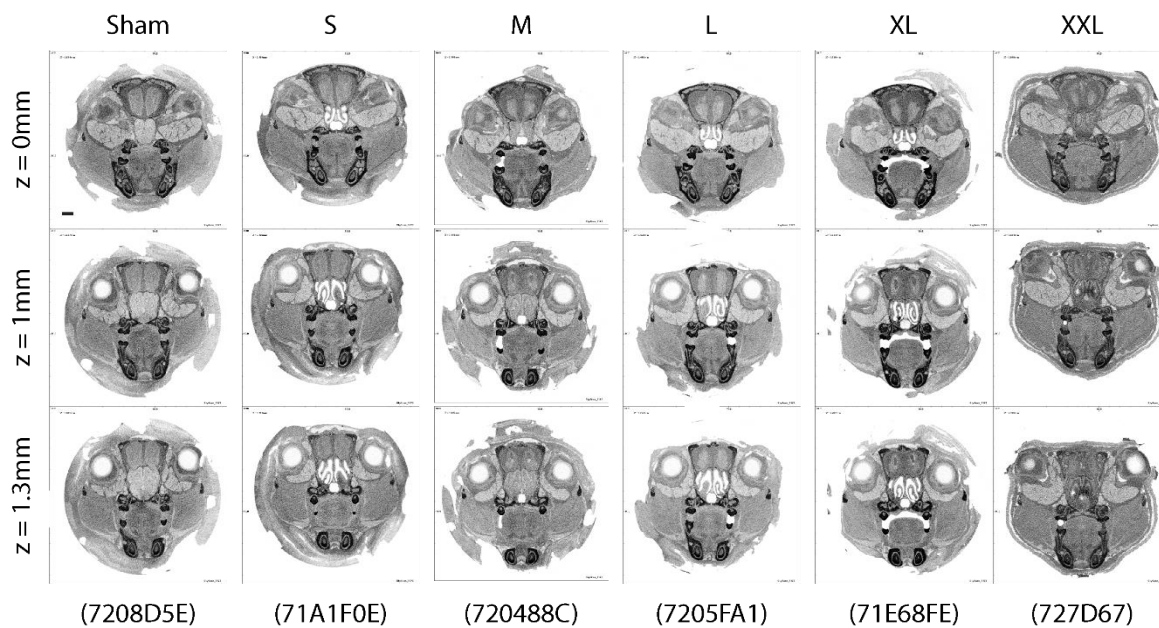

Supplementary figure 1 – Excitotoxic olfactory bulb lesions. MicroCT images from mice injected with varying amounts of NMDA into the olfactory bulb (Sham: 0ng, S: 303.6ng, M: 607.2ng, L: 1214ng, XL 1669.8ng, XXL: 2125ng). Images are reconstructed coronal sections from a whole mouse head, starting at 0mm from bregma, to 1-1.3mm anterior from bregma (roughly the olfactory bulb injection site). Images are inverted such that darker regions correspond to more x-ray absorbent areas (e.g. skull, teeth, soft tissue absent areas where contrast agent has pooled). Bottom row: codes in brackets indicate RFID of animal used as representative example.

1172

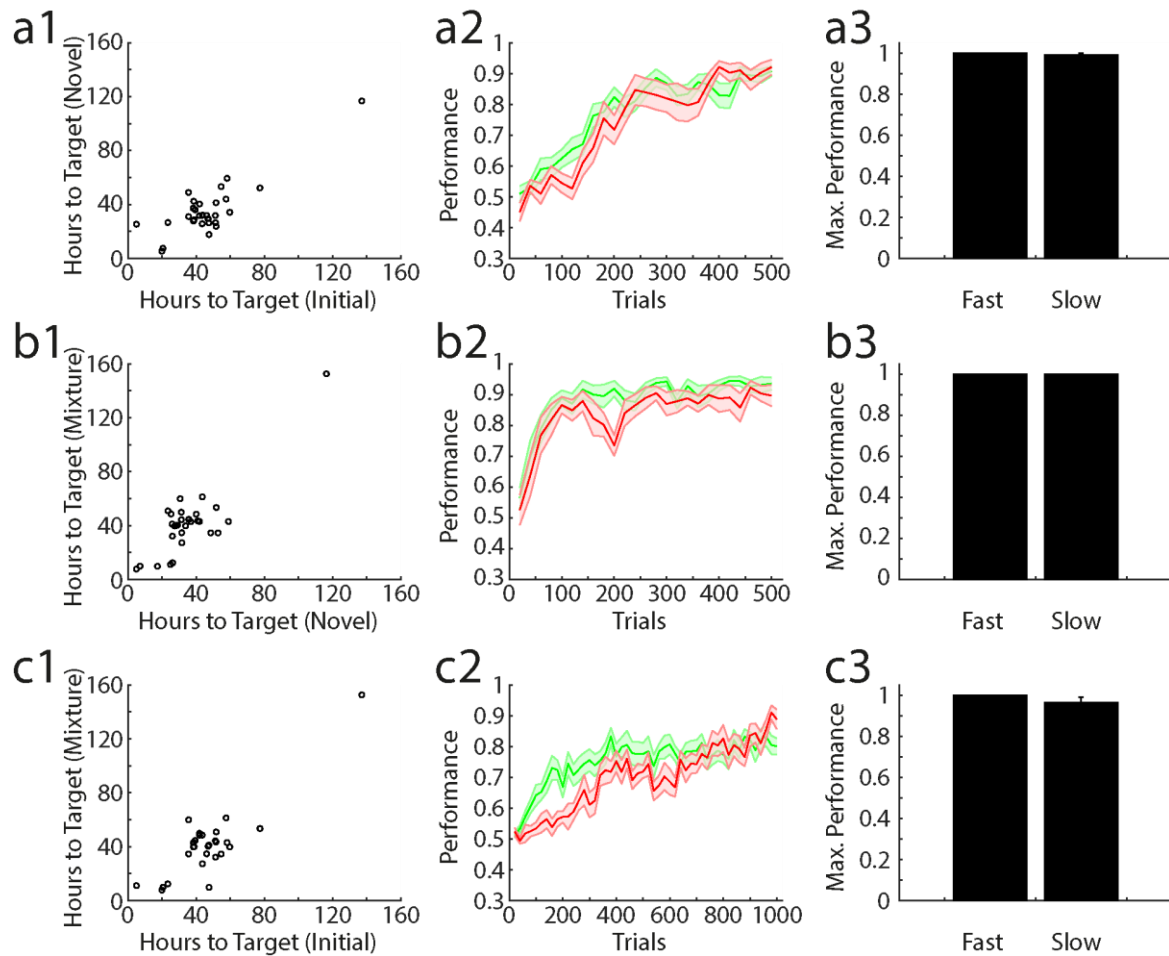

*Supplementary figure 2 – Quality of learning during olfactory discrimination in AutoMouse related to time taken to perform trials. (a1) Number of hours taken to perform a target number of trials (1<sup>st</sup> 500) during initial odour pair learning vs. novel odour pair learning ( $n = 29$ ). Hours to target are significantly correlated across the two task types ( $R = 0.84$ ,  $p = 1.22 \times 10^{-8}$ ). (a2) Performing animals are classified according to the rate at which they perform trials. For 4 task types (initial, novel, mixture, familiar) the time taken to perform the 1<sup>st</sup> 500 trials in each was averaged for each animal. Fast (green,  $n = 17$ ) animals are those with mean time to target completion greater than the mean time to completion over all animals and slow (red,  $n = 12$ ) animals are those with mean time to target completion less than this average. Performance is shown for both groups on initial odour pair discrimination. (a3) Mean maximum performance in the initial odour pair discrimination for the same groups in (a2). (b1) Hours to target for novel odour pair vs. mixture learning ( $R = 0.85$ ,  $p = 5.48 \times 10^{-9}$ ). (b2) Performance for the fast and slow groups in a novel odour pair task. (b3) Average maximum performance in the novel odour pair task. (c1) Hours to target for initial vs. mixture learning ( $R = 0.86$ ,  $p = 1.54 \times 10^{-9}$ ). (c2) Performance for the fast and slow groups in a mixture discrimination task. (c3) Average maximum performance in the mixture discrimination task.*

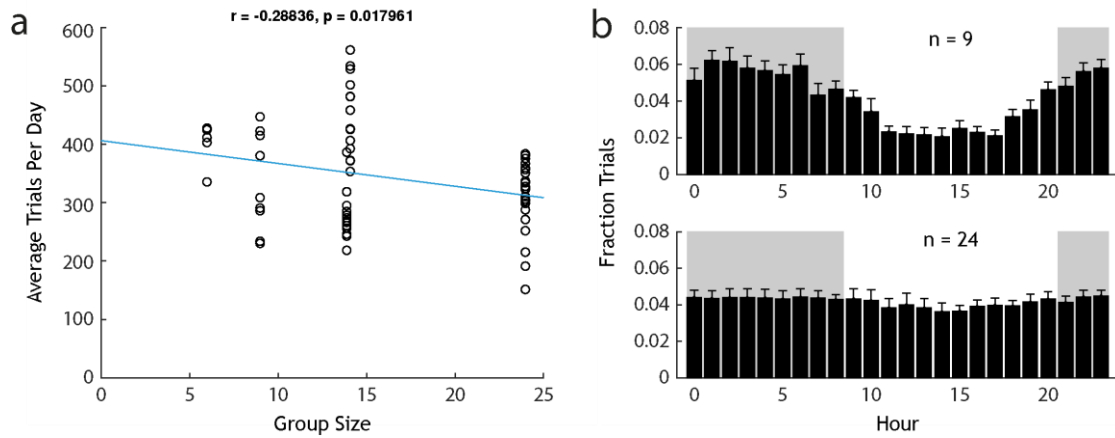

Supplementary figure 3 – Differences in performance for AutonoMouse cohort sizes. **(a)** Average trials per day for each animal plotted against the group size (number of animals) in which the animal performed. There is a significant negative correlation between group size and daily trials performed for each animal. **(b)** Fraction of trials performed each hour analysed as in fig. 2d for a cohort of  $n = 9$  mice (top) and  $n = 24$  mice (bottom).
